# Supplementary material for: Determining the Control Circuitry of Redox Metabolism at the Genome-Scale
Source: PubMed Central journal article supplement (PMC3974632; doi:10.1371/journal.pgen.1004264), 2014-04-03

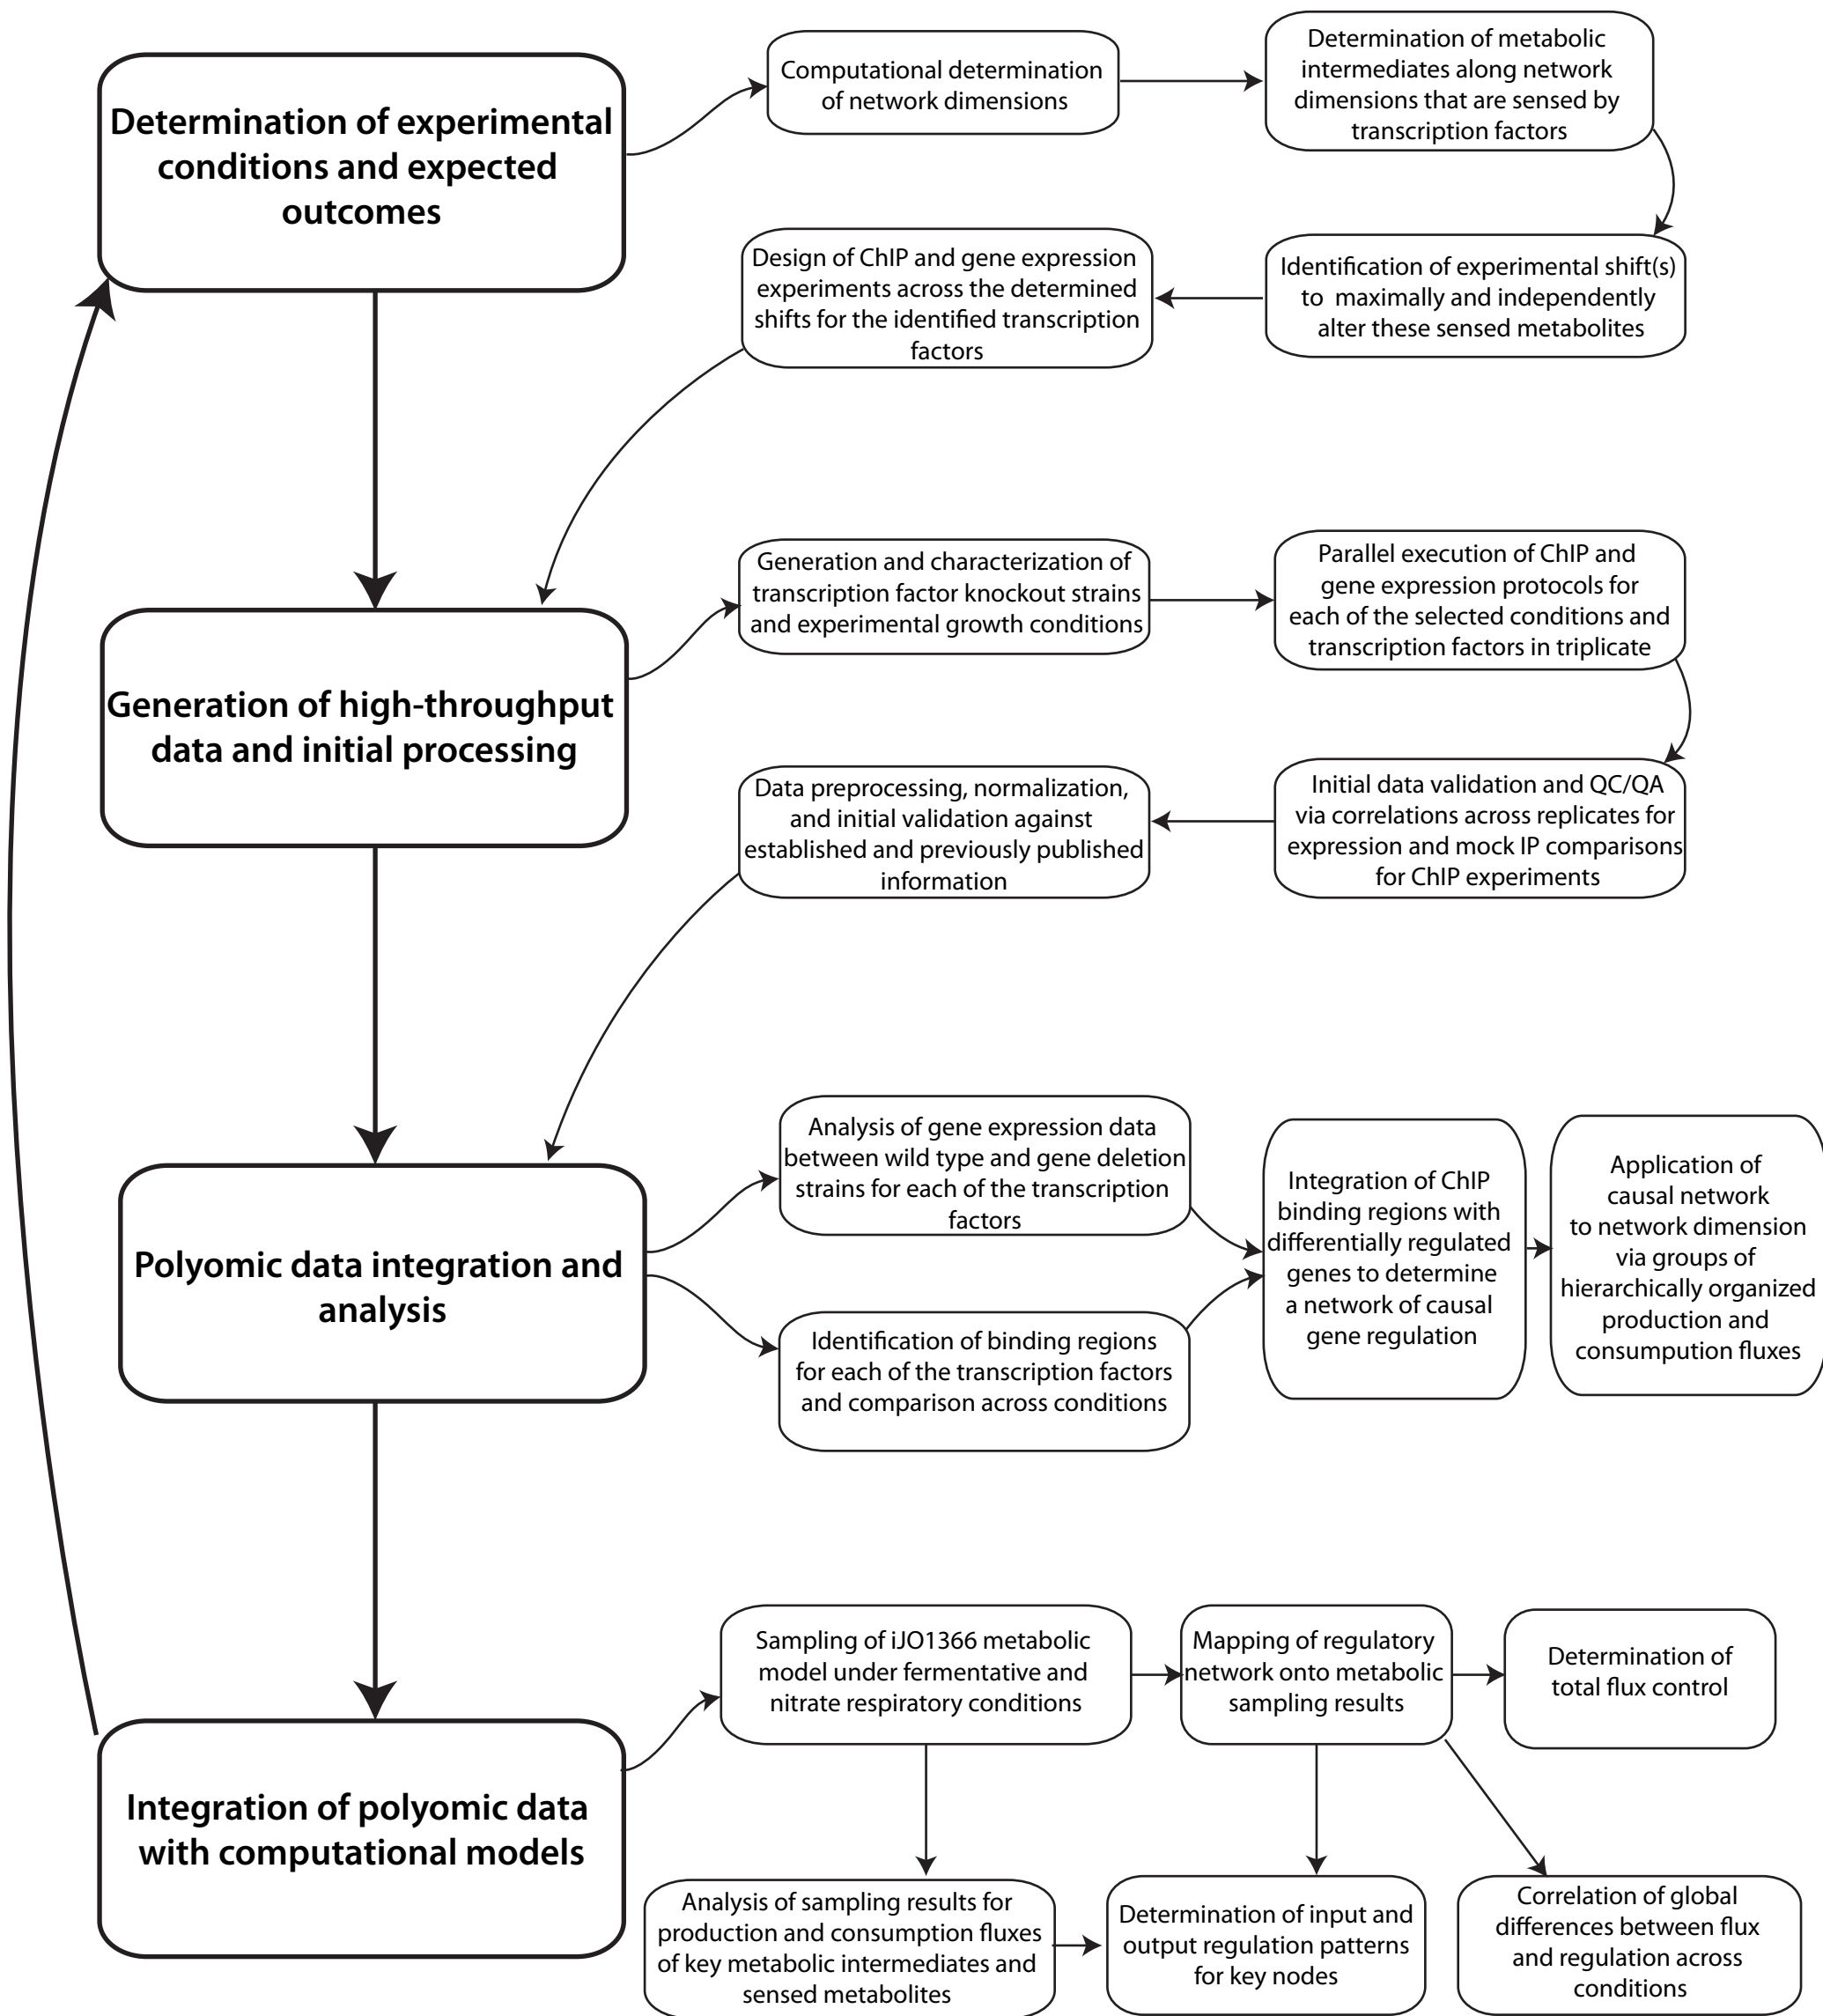

Supplement: pgen.1004264.s001.pdf [file pgen.1004264.s001.pdf]
