# Supplementary material for: Determining the Control Circuitry of Redox Metabolism at the Genome-Scale
Source: PubMed Central journal article supplement (PMC3974632; doi:10.1371/journal.pgen.1004264), 2014-04-03
Supplement: pgen.1004264.s002.pdf [file pgen.1004264.s002.pdf]

### ArcA ChIP peak discrepancies

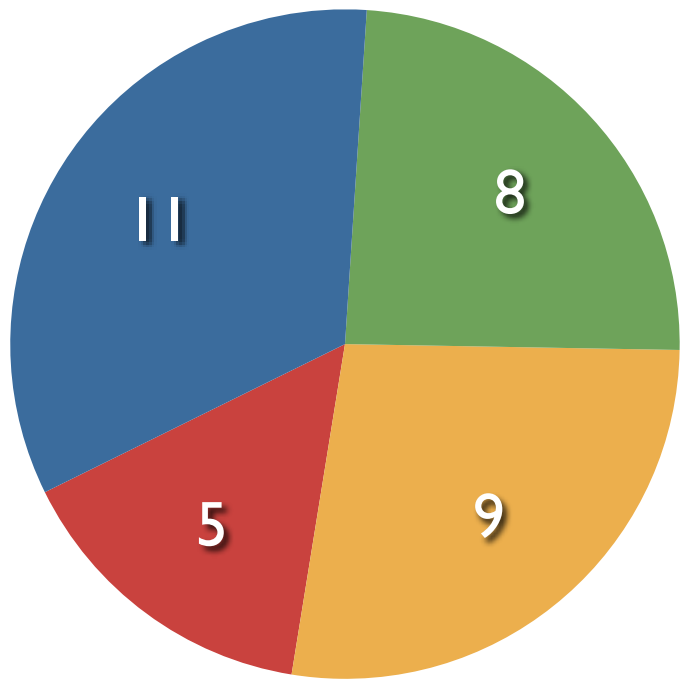

• 33/146 ChIP peaks not found in our data

- ChIP peak (one replicate)
- Weak peaks
- Phage/sRNA/rRNA related
- No signal

### Fnr ChIP peak discrepancies

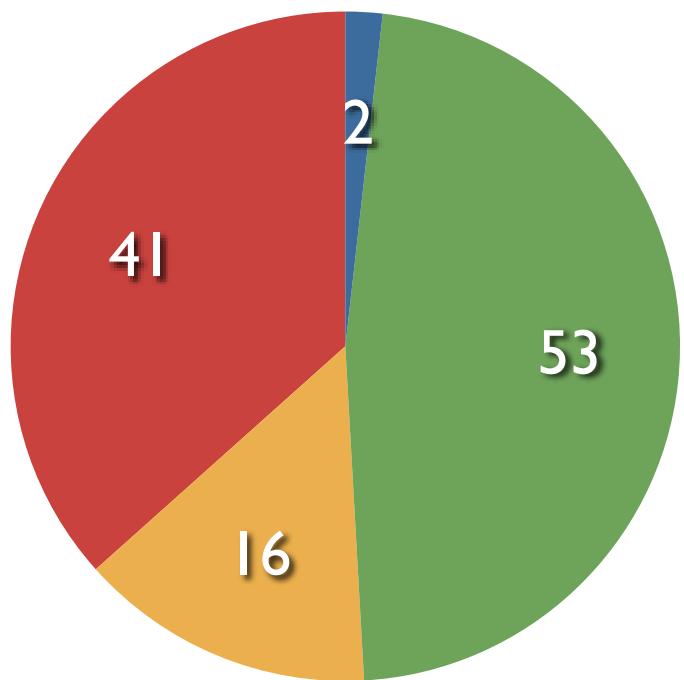

• 112/226 ChIP peaks not found in our data

- CHIP peak (one replicate)
- Weak peaks
- Phage/sRNA/rRNA related
- No signal
