# Supplementary material for: Determining the Control Circuitry of Redox Metabolism at the Genome-Scale
Source: PubMed Central journal article supplement (PMC3974632; doi:10.1371/journal.pgen.1004264), 2014-04-03
Supplement: pgen.1004264.s003.pdf [file pgen.1004264.s003.pdf]

## Fnr expression discrepancies

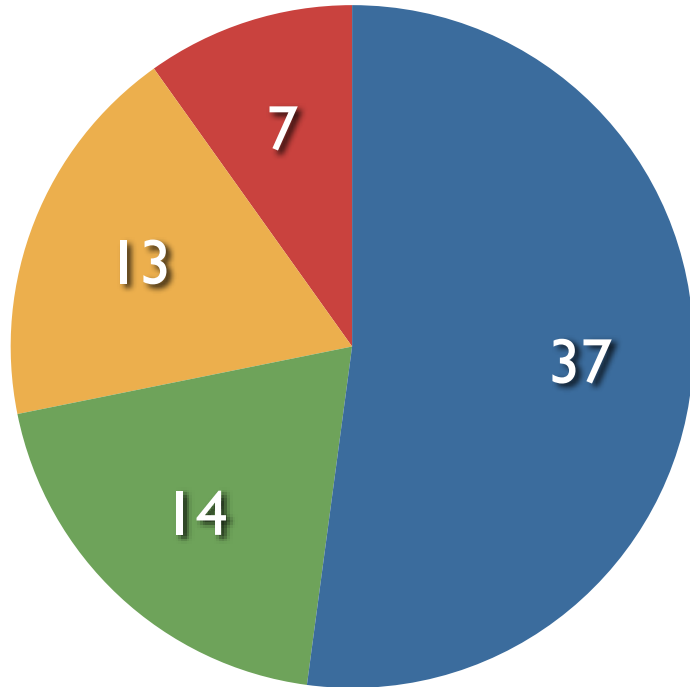

•71/258 differential expression measurements not found in our data

- Not expressed or lowly expressed
- Not measured on array
- Not significant (missed)
- Just above cutoff

## ArcA expression discrepancies

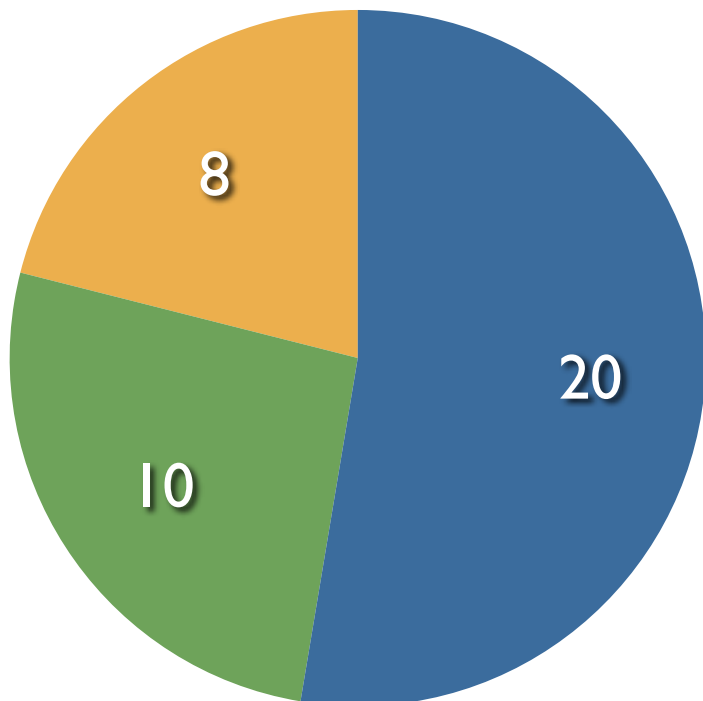

•38/229 differential expression measurements not found in our data

- Not expressed or lowly expressed
- Not measured on array
- Not significant (missed)
