# Supplementary material for: Determining the Control Circuitry of Redox Metabolism at the Genome-Scale
Source: PubMed Central journal article supplement (PMC3974632; doi:10.1371/journal.pgen.1004264), 2014-04-03

# Cytoplasm

# Periplasm

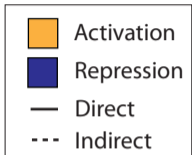

Tyrosine

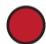

aroP

Serine

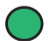

sstT

Fnr

ArcA

NAD<sup>+</sup>

NADH

tyrA

tyrB

Tyr

NAD<sup>+</sup>

NADH

serA

serC

serB

Ser

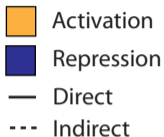

Supplement: pgen.1004264.s007.pdf [file pgen.1004264.s007.pdf]
