# Supplementary material for: Determining the Control Circuitry of Redox Metabolism at the Genome-Scale
Source: PubMed Central journal article supplement (PMC3974632; doi:10.1371/journal.pgen.1004264), 2014-04-03
Supplement: pgen.1004264.s009.pdf [file pgen.1004264.s009.pdf]

**Supplementary Table 1. ArcA-associated regions under fermentative conditions identified by ChIP-chip analysis and its regulatory effect on the target operons determined by expression profiles.** This table summarizes the results of ChIP-chip experiments to determine the genome-wide locations of DNA targets for ArcA binding in exponential phase *E. coli* cells growing in strictly anaerobic minimal media conditions. First and second columns indicate identified ArcA-binding peaks (Start: left-end peak position, End: right-end peak position). The third column indicates the log<sub>2</sub> ratio of each ArcA-binding peak.

| Peak start | Peak end | Occupancy | Strand | Operon                                                             | Regulation | Regulon DB |
|------------|----------|-----------|--------|--------------------------------------------------------------------|------------|------------|
| 41673      | 42043    | 6.21      | -      | [caiA, caiB, caiC, caiD, caiE, caiT]                               | N/D        | Known      |
| 127592     | 127887   | 3.17      | +      | [lpd]                                                              | Repression | Known      |
| 131051     | 131535   | 14.86     | +      | [acnB]                                                             | Repression | Known      |
| 243102     | 243589   | 9.24      | -      | [fadE]                                                             | Repression | Known      |
| 328313     | 328569   | 7.48      | -      | [betA, betB, betI]                                                 | Repression | Known      |
| 367666     | 368120   | 15        | -      | [lacI, mhpR]                                                       | Repression |            |
| 450610     | 451407   | 42.28     | -      | [cyoA, cyoB, cyoC, cyoD, cyoE]                                     | Repression | Known      |
| 727996     | 728351   | 4.57      | -      | [kdpA, kdpB, kdpC, kdpF]                                           | Repression |            |
| 727996     | 728351   | 4.57      | +      | [ybfA]                                                             | Activation |            |
| 754078     | 754422   | 12.18     | +      | [sdhA, sdhB, sdhC, sdhD, sucA, sucB, sucC, sucD]                   | Repression | Known      |
| 754078     | 754422   | 12.18     | -      | [gltA]                                                             | Repression | Known      |
| 770022     | 770651   | 20.42     | +      | [cydA, cydB]                                                       | N/D        | Known      |
| 858148     | 858715   | 15.04     | -      | [ybiU]                                                             | N/D        |            |
| 892526     | 892922   | 10.03     | +      | [potF, potG, potH, potI]                                           | Repression |            |
| 922324     | 922705   | 4.74      | +      | [clpA, clpS]                                                       | Repression |            |
| 930002     | 930806   | 35.11     | -      | [cydC, cydD]                                                       | Activation | Known      |
| 989731     | 990093   | 9.93      | -      | [pncB]                                                             | Activation |            |
| 989731     | 990093   | 9.93      | +      | [pepN]                                                             | Repression |            |
| 1072984    | 1073676  | 26.12     | +      | [rutR]                                                             | N/D        |            |
| 1072984    | 1073676  | 26.12     | -      | [rutA, rutB, rutC, rutD, rutE, rutF, rutG]                         | N/D        | Known      |
| 1077976    | 1078513  | 16.17     | +      | [putP]                                                             | Repression |            |
| 1077976    | 1078513  | 16.17     | -      | [putA]                                                             | Repression |            |
| 1083942    | 1084376  | 9.1       | +      | [phoH]                                                             | Repression |            |
| 1118029    | 1118304  | 4.38      | -      | [yceI, yceJ]                                                       | N/D        |            |
| 1165381    | 1165681  | 8.52      | +      | [ndh]                                                              | N/D        | Known      |
| 1194055    | 1194546  | 11.94     | +      | [icd]                                                              | Repression | Known      |
| 1232191    | 1232571  | 4.11      | -      | [dsbB]                                                             | Activation |            |
| 1249988    | 1250500  | 13.65     | +      | [dhaR]                                                             | N/D        |            |
| 1249988    | 1250500  | 13.65     | -      | [dhaK, dhaL, dhaM]                                                 | N/D        |            |
| 1298414    | 1299077  | 9.99      | +      | [oppA, oppB, oppC, oppD, oppF]                                     | Activation | Known      |
| 1358916    | 1359404  | 10.18     | -      | [puuA]                                                             | Repression | Known      |
| 1358916    | 1359404  | 10.18     | +      | [puuD, puuR]                                                       | Repression | Known      |
| 1386680    | 1387030  | 5.38      | -      | [tpx]                                                              | Repression | Known      |
| 1395321    | 1395688  | 3.95      | +      | [ynaJ]                                                             | Repression |            |
| 1445043    | 1445306  | 5.92      | -      | [feaR]                                                             | N/D        |            |
| 1445043    | 1445306  | 5.92      | +      | [feaB]                                                             | N/D        |            |
| 1451593    | 1452006  | 6.74      | +      | [paaA, paaB, paaC, paaD, paaE, paaF, paaG, paaH, paaI, paaJ, paaK] | N/D        |            |
| 1451593    | 1452006  | 6.74      | -      | [maoC]                                                             | N/D        |            |
| 1485972    | 1486451  | 8.72      | +      | [aldA]                                                             | Repression | Known      |
| 1520897    | 1521355  | 5.49      | -      | [yncD]                                                             | N/D        |            |
| 1520897    | 1521355  | 5.49      | +      | [yncE]                                                             | N/D        |            |
| 1560974    | 1561381  | 4.54      | -      | [ddpA, ddpB, ddpC, ddpD, ddpF, ddpX]                               | N/D        |            |
| 1608401    | 1608967  | 7.33      | -      | [uxaB]                                                             | N/D        |            |
| 1675896    | 1676296  | 3.44      | -      | [pntA, pntB]                                                       | Activation |            |
| 1679651    | 1680231  | 6.65      | -      | [ydgC]                                                             | N/D        |            |
| 1679651    | 1680231  | 6.65      | +      | [rstA, rstB]                                                       | N/D        |            |

|         |         |       |   |                                                                                |            |       |
|---------|---------|-------|---|--------------------------------------------------------------------------------|------------|-------|
| 1684671 | 1685000 | 4.13  | - | [fumC]                                                                         | N/D        | Known |
| 1686175 | 1686721 | 6.87  | + | [manA]                                                                         | Activation |       |
| 1686175 | 1686721 | 6.87  | - | [fumA]                                                                         | Repression | Known |
| 1829769 | 1830203 | 14.16 | - | [astA, astB, astC, astD, astE]                                                 | Repression |       |
| 1887540 | 1888069 | 13.12 | - | [fadD]                                                                         | Repression | Known |
| 1976188 | 1976458 | 7.36  | - | [flhC, flhD]                                                                   | Activation |       |
| 1977346 | 1977771 | 13.36 | + | [uspC]                                                                         | N/D        |       |
| 1977346 | 1977771 | 13.36 | - | [insA-5, insB-5]                                                               | N/D        |       |
| 1985963 | 1986293 | 4.31  | - | [azuC, isrB, yecJ]                                                             | N/D        |       |
| 1985963 | 1986293 | 4.31  | + | [yecR]                                                                         | N/D        |       |
| 2238314 | 2238893 | 18.72 | - | [mglA, mglB, mglC]                                                             | Repression |       |
| 2263947 | 2264426 | 6.57  | + | [yeiQ]                                                                         | N/D        |       |
| 2275985 | 2276585 | 18.4  | - | [yejG]                                                                         | Repression |       |
| 2304730 | 2305072 | 4.37  | - | [mqo]                                                                          | Repression |       |
| 2310839 | 2311659 | 24.17 | - | [ompC]                                                                         | Activation |       |
| 2310839 | 2311659 | 24.17 | + | [micF, rcsB, rcsD]                                                             | Activation |       |
| 2384877 | 2385185 | 6.48  | + | [yfbM]                                                                         | N/D        |       |
| 2403052 | 2403517 | 8.02  | - | [nuoA, nuoB, nuoC, nuoE, nuoF, nuoG, nuoH, nuol, nuoJ, nuoK, nuoL, nuoM, nuoN] | Repression | Known |
| 2425640 | 2426190 | 15.61 | - | [argT, hisJ, hisM, hisP, hisQ]                                                 | Repression |       |
| 2458450 | 2458955 | 11.21 | - | [fadI, fadJ, yfcZ]                                                             | Repression |       |
| 2496255 | 2496563 | 3.36  | - | [yfdZ]                                                                         | N/D        |       |
| 2496255 | 2496563 | 3.36  | + | [ypdA, ypdB, ypdC]                                                             | N/D        |       |
| 2511143 | 2511538 | 6.89  | + | [nupC]                                                                         | Activation |       |
| 2561262 | 2561604 | 4.49  | + | [yffQ, yffR]                                                                   | N/D        |       |
| 2642690 | 2643090 | 7.15  | - | [ndk]                                                                          | Repression |       |
| 2666749 | 2667128 | 8.22  | - | [hcaR]                                                                         | N/D        |       |
| 2666749 | 2667128 | 8.22  | + | [hcaB, hcaC, hcaD, hcaE, hcaF]                                                 | N/D        |       |
| 2716446 | 2716865 | 5.62  | - | [yfiF]                                                                         | Activation |       |
| 2723572 | 2723872 | 3.48  | - | [kgtP]                                                                         | Repression |       |
| 2786701 | 2787319 | 25.66 | + | [csiD, gabD, gabP, gabT, lhgO]                                                 | Repression |       |
| 2940428 | 2940878 | 11.1  | + | [gcvB]                                                                         | N/D        |       |
| 2940428 | 2940878 | 11.1  | - | [gcvA]                                                                         | N/D        |       |
| 3125935 | 3126447 | 15.57 | + | [glcC]                                                                         | Repression |       |
| 3125935 | 3126447 | 15.57 | - | [glcA, glcB, glcD, glcE, glcF, glcG]                                           | Repression | Known |
| 3216895 | 3217770 | 38.1  | + | [yggG]                                                                         | Repression |       |
| 3229662 | 3230012 | 8.17  | + | [fadH]                                                                         | N/D        | Known |
| 3237433 | 3237862 | 4.8   | + | [sstT]                                                                         | Activation |       |
| 3242567 | 3243093 | 5.39  | + | [exuT]                                                                         | N/D        |       |
| 3242567 | 3243093 | 5.39  | - | [uxaA, uxaC]                                                                   | N/D        |       |
| 3382293 | 3382689 | 5.46  | - | [mdh]                                                                          | Repression | Known |
| 3523980 | 3524692 | 6.25  | - | [nudE]                                                                         | Repression |       |
| 3537747 | 3538156 | 5.09  | + | [feoA, feoB, feoC]                                                             | N/D        |       |
| 3559590 | 3560232 | 7.54  | - | [glpE, glpG, glpR]                                                             | Repression |       |
| 3590034 | 3590717 | 13.69 | - | [ugpA, ugpB, ugpC, ugpE, ugpQ]                                                 | Repression |       |
| 3663707 | 3664344 | 7.12  | - | [gadW, gadX]                                                                   | Activation | Known |
| 3672095 | 3673091 | 58.62 | + | [yhjE]                                                                         | Repression |       |
| 3705835 | 3706180 | 5.51  | - | [dppA, dppB, dppC, dppD, dppF]                                                 | Activation |       |
| 3710036 | 3710417 | 8.83  | - | [yhjX]                                                                         | N/D        |       |
| 3737340 | 3737681 | 5.16  | + | [avtA]                                                                         | N/D        |       |
| 3775016 | 3775341 | 4.38  | + | [lldD, lldP, lldR]                                                             | N/D        | Known |
| 3839670 | 3839963 | 4.71  | - | [nepI]                                                                         | N/D        |       |
| 3891618 | 3891908 | 3.95  | + | [yieE, yieF]                                                                   | N/D        |       |
| 4001099 | 4001479 | 8.02  | - | [yigF, yigG]                                                                   | N/D        |       |
| 4002474 | 4002970 | 4.49  | - | [yigI]                                                                         | Repression |       |
| 4002474 | 4002970 | 4.49  | + | [pldA]                                                                         | Activation |       |
| 4028847 | 4029206 | 6.02  | + | [hemG, pepQ, trkH, yigZ]                                                       | conflict   |       |

|         |         |       |   |                                                                                            |            |       |
|---------|---------|-------|---|--------------------------------------------------------------------------------------------|------------|-------|
| 4028847 | 4029206 | 6.02  | - | [fadA, fadB]                                                                               | Repression | Known |
| 4083326 | 4083676 | 3.15  | - | [fdhE, fdoG, fdoH, fdol]                                                                   | Activation |       |
| 4158619 | 4159036 | 9.69  | - | [sthA]                                                                                     | Repression | Known |
| 4194200 | 4194700 | 7.06  | - | [thiC, thiE, thiF, thiG, thiH, thiS]                                                       | Repression |       |
| 4250255 | 4250645 | 9.92  | + | [ubiA, ubiC]                                                                               | N/D        |       |
| 4285048 | 4285577 | 16.88 | + | [nrfA, nrfB, nrfC, nrfD, nrfE, nrfF, nrfG]                                                 | Activation |       |
| 4285048 | 4285577 | 16.88 | - | [acs, actP, yjcH]                                                                          | Repression |       |
| 4323037 | 4323628 | 7.91  | - | [phnC, phnD, phnE, phnF, phnG, phnH,<br>phnI, phnJ, phnK, phnL, phnM, phnN,<br>phnO, phnP] | N/D        |       |
| 4346670 | 4347185 | 6.82  | - | [dcuB, fumB]                                                                               | Activation |       |
| 4364658 | 4365208 | 5.87  | - | [dcuA]                                                                                     | Activation |       |
| 4427459 | 4427784 | 8.55  | + | [cycA]                                                                                     | N/D        |       |
| 4560494 | 4560948 | 13.42 | - | [yjiJ]                                                                                     | N/D        |       |
| 4569465 | 4569782 | 6.6   | + | [yjiS]                                                                                     | N/D        |       |
| 4569465 | 4569782 | 6.6   | - | [yjiR]                                                                                     | N/D        |       |
| 4608883 | 4609308 | 4.19  | + | [osmY]                                                                                     | Repression |       |
| 4638782 | 4638982 | 3.22  | - | [arcA]                                                                                     | Activation |       |
