# Supplementary material for: Determining the Control Circuitry of Redox Metabolism at the Genome-Scale
Source: PubMed Central journal article supplement (PMC3974632; doi:10.1371/journal.pgen.1004264), 2014-04-03
Supplement: pgen.1004264.s010.pdf [file pgen.1004264.s010.pdf]

**Supplementary Table 2. ArcA-associated regions under nitrate respiratory conditions identified by ChIP-chip analysis and its regulatory effect on the target operons determined by expression profiles.**

This table summarizes the results of ChIP-chip experiments to determine the genome-wide locations of DNA targets for ArcA binding in exponential phase *E. coli* cells growing in strictly anaerobic minimal media with the addition of 20mm KNO<sub>3</sub>. First and second columns indicate identified ArcA-binding peaks (Start: left-end peak position, End: right-end peak position). The third column indicates the log<sub>2</sub> ratio of each ArcA-binding peak.

| Peak start | Peak end | Occupancy | Strand | Operon                                           | Regulation | Regulon DB |
|------------|----------|-----------|--------|--------------------------------------------------|------------|------------|
| 22         | 205      | 2.63      | +      | [thrA, thrB, thrC, thrL]                         | Repression |            |
| 21121      | 21465    | 5.86      | +      | [fkpB, ileS, ispH, lspA, ribF]                   | Activation |            |
| 21121      | 21465    | 5.86      | -      | [rpsT]                                           | Activation |            |
| 29489      | 30064    | 8.02      | +      | [carA, carB]                                     | Activation |            |
| 41664      | 42181    | 7.87      | -      | [caiA, caiB, caiC, caiD, caiE, caiT]             | Activation | Known      |
| 83468      | 83931    | 9.42      | -      | [leuA, leuB, leuC, leuD, leuL]                   | Activation |            |
| 127633     | 128251   | 6.51      | +      | [lpd]                                            | Repression | Known      |
| 131272     | 131772   | 7.19      | +      | [acnB]                                           | Repression | Known      |
| 131272     | 131772   | 7.19      | -      | [yach]                                           | N/D        |            |
| 243079     | 243744   | 8.38      | -      | [fadE]                                           | Repression | Known      |
| 243079     | 243744   | 8.38      | +      | [ipcA]                                           | N/D        |            |
| 367853     | 368107   | 5.65      | -      | [lacl, mhpR]                                     | Repression |            |
| 367853     | 368107   | 5.65      | +      | [mhpA, mhpB, mhpC, mhpD, mhpE, mhpF]             | Repression |            |
| 450221     | 451684   | 77.87     | -      | [cyoA, cyoB, cyoC, cyoD, cyoE]                   | Repression | Known      |
| 727885     | 728489   | 5.78      | -      | [kdpA, kdpB, kdpC, kdpF]                         | N/D        |            |
| 727885     | 728489   | 5.78      | +      | [ybfA]                                           | Activation |            |
| 753888     | 754426   | 19.63     | +      | [sdhA, sdhB, sdhC, sdhD, sucA, sucB, sucC, sucD] | Repression | Known      |
| 753888     | 754426   | 19.63     | -      | [gltA]                                           | Repression | Known      |
| 769905     | 770563   | 14.61     | +      | [cydA, cydB]                                     | Activation | Known      |
| 815916     | 816683   | 13.7      | +      | [moaA, moaB, moaC, moaD, moaE]                   | Repression |            |
| 815916     | 816683   | 13.7      | -      | [ybhK]                                           | Activation |            |
| 840676     | 841126   | 7.62      | -      | [fiu, mcbA]                                      | Repression |            |
| 857915     | 858999   | 49.88     | -      | [ybiU]                                           | Repression |            |
| 862364     | 862943   | 8.59      | -      | [ybiW, ybiY]                                     | N/D        |            |
| 862364     | 862943   | 8.59      | +      | [fsaA]                                           | Activation |            |
| 865743     | 866455   | 13.12     | +      | [gsiA, gsiB, gsiC, gsiD, iaaA]                   | Activation |            |
| 877089     | 877801   | 7.1       | +      | [bssR]                                           | Repression |            |
| 877089     | 877801   | 7.1       | -      | [rimO]                                           | Activation |            |
| 892368     | 893009   | 24.98     | +      | [potF, potG, potH, potI]                         | Repression |            |
| 917844     | 918319   | 7.05      | +      | [macA, macB]                                     | Repression |            |
| 917844     | 918319   | 7.05      | -      | [ybjX]                                           | Activation |            |
| 924976     | 925842   | 13.99     | -      | [infA, serW]                                     | Activation |            |
| 930102     | 930635   | 12.21     | -      | [cydC, cydD]                                     | Activation | Known      |
| 953235     | 954107   | 10.37     | -      | [focA, pflB]                                     | Repression | Known      |
| 989551     | 989881   | 8.78      | +      | [pepN]                                           | Repression |            |
| 989551     | 989881   | 8.78      | -      | [pncB]                                           | N/D        |            |
| 1014840    | 1015615  | 8.1       | +      | [rmf]                                            | N/D        |            |
| 1030559    | 1031021  | 8.71      | -      | [serT, yccA]                                     | N/D        |            |
| 1072946    | 1073509  | 12.52     | -      | [rutA, rutB, rutC, rutD, rutE, rutF, rutG]       | N/D        | Known      |
| 1072946    | 1073509  | 12.52     | +      | [rutR]                                           | N/D        |            |
| 1078134    | 1079013  | 11.09     | +      | [putP]                                           | N/D        |            |
| 1084046    | 1084376  | 4         | +      | [phoH]                                           | N/D        |            |
| 1145843    | 1146734  | 14.94     | +      | [fabD, fabG, fabH, plsX, psrD, rpmF, yceD]       | Activation |            |
| 1150735    | 1151219  | 7.77      | +      | [acpP, fabF]                                     | Activation |            |
| 1156739    | 1157531  | 9.54      | +      | [ptsG]                                           | Activation | Known      |
| 1165276    | 1165541  | 3.22      | +      | [ndh]                                            | N/D        | Known      |
| 1194146    | 1194605  | 9.34      | +      | [icd]                                            | Repression | Known      |
| 1194146    | 1194605  | 9.34      | -      | [nudJ, rluE]                                     | N/D        |            |

|         |         |       |   |                                                                                |            |       |
|---------|---------|-------|---|--------------------------------------------------------------------------------|------------|-------|
| 1232163 | 1232721 | 9.94  | - | [dsbB]                                                                         | Activation |       |
| 1358699 | 1359349 | 6.29  | + | [puuD, puuR]                                                                   | Repression | Known |
| 1358699 | 1359349 | 6.29  | - | [puuA]                                                                         | N/D        | Known |
| 1386238 | 1387113 | 6.73  | - | [tpx]                                                                          | Repression | Known |
| 1386238 | 1387113 | 6.73  | + | [ycjG]                                                                         | N/D        |       |
| 1451672 | 1452114 | 4.29  | + | [paaA, paaB, paaC, paaD, paaE, paaF, paaG, paaH, paal, paaJ, paaK]             | Repression |       |
| 1451672 | 1452114 | 4.29  | - | [maoC]                                                                         | N/D        |       |
| 1485851 | 1486522 | 7.2   | + | [aldA]                                                                         | Repression | Known |
| 1520872 | 1521293 | 5.53  | + | [yncE]                                                                         | Repression |       |
| 1520872 | 1521293 | 5.53  | - | [yncD]                                                                         | Repression |       |
| 1608517 | 1608984 | 9.41  | - | [uxaB]                                                                         | N/D        |       |
| 1675706 | 1676221 | 7.42  | - | [pntA, pntB]                                                                   | Activation |       |
| 1679542 | 1680354 | 9     | - | [ydgC]                                                                         | Repression |       |
| 1679542 | 1680354 | 9     | + | [rstA, rstB]                                                                   | Activation |       |
| 1686396 | 1686946 | 3.93  | - | [fumA]                                                                         | Repression | Known |
| 1686396 | 1686946 | 3.93  | + | [manA]                                                                         | N/D        |       |
| 1829936 | 1830386 | 10.65 | - | [astA, astB, astC, astD, astE]                                                 | Repression |       |
| 1829936 | 1830386 | 10.65 | + | [xthA]                                                                         | Repression |       |
| 1860590 | 1861003 | 9.56  | + | [gapA, yeaD]                                                                   | Repression |       |
| 1860590 | 1861003 | 9.56  | - | [msrB]                                                                         | Repression |       |
| 1887394 | 1888236 | 11.08 | - | [fadD]                                                                         | Repression | Known |
| 1976263 | 1976504 | 6.64  | - | [flhC, flhD]                                                                   | Activation |       |
| 1977375 | 1977654 | 8.13  | + | [uspC]                                                                         | N/D        |       |
| 1977375 | 1977654 | 8.13  | - | [insA-5, insB-5]                                                               | N/D        |       |
| 2238472 | 2238897 | 6.42  | - | [mglA, mglB, mglC]                                                             | Repression |       |
| 2241347 | 2241935 | 5.71  | + | [yeiG]                                                                         | N/D        |       |
| 2241347 | 2241935 | 5.71  | - | [folE, yeiB]                                                                   | Repression |       |
| 2244605 | 2245268 | 8.28  | - | [cirA]                                                                         | Repression |       |
| 2263985 | 2264339 | 5.96  | + | [yeiQ]                                                                         | Repression |       |
| 2276039 | 2276443 | 10.69 | - | [yejG]                                                                         | Repression |       |
| 2280151 | 2280914 | 8.61  | + | [rplY]                                                                         | Activation |       |
| 2284173 | 2284656 | 5.86  | + | [proL]                                                                         | N/D        |       |
| 2304509 | 2304868 | 4.77  | - | [mqo]                                                                          | Repression |       |
| 2310743 | 2311405 | 16.34 | + | [micF]                                                                         | Activation |       |
| 2310743 | 2311405 | 16.34 | - | [ompC]                                                                         | Activation |       |
| 2384706 | 2385289 | 9.64  | + | [yfbM]                                                                         | N/D        |       |
| 2402959 | 2403487 | 14.09 | - | [nuoA, nuoB, nuoC, nuoE, nuoF, nuoG, nuoH, nuol, nuoJ, nuoK, nuoL, nuoM, nuoN] | Repression | Known |
| 2425948 | 2426273 | 4.79  | - | [argT, hisJ, hisM, hisP, hisQ]                                                 | Repression |       |
| 2458400 | 2458764 | 5.48  | - | [fadI, fadJ]                                                                   | Repression | Known |
| 2496347 | 2496888 | 12.8  | + | [ypdA, ypdB, ypdC]                                                             | Activation |       |
| 2496347 | 2496888 | 12.8  | - | [yfdZ]                                                                         | N/D        |       |
| 2510813 | 2511330 | 7.2   | - | [mntH]                                                                         | Repression |       |
| 2510813 | 2511330 | 7.2   | + | [nupC]                                                                         | Activation |       |
| 2561187 | 2561595 | 4.1   | + | [yffQ, yffR]                                                                   | N/D        |       |
| 2631812 | 2632525 | 13.65 | + | [xseA]                                                                         | Activation |       |
| 2631812 | 2632525 | 13.65 | - | [guaA, guaB]                                                                   | N/D        |       |
| 2642597 | 2643118 | 10.23 | - | [ndk]                                                                          | Repression |       |
| 2661207 | 2661749 | 6.87  | + | [suhB]                                                                         | N/D        |       |
| 2661207 | 2661749 | 6.87  | - | [trmJ]                                                                         | N/D        |       |
| 2753425 | 2754054 | 12.09 | + | [ssrA]                                                                         | N/D        |       |
| 2786581 | 2787102 | 9.1   | + | [csiD, gabD, gabP, gabT, lhgO]                                                 | Repression |       |
| 2922199 | 2922704 | 9.25  | - | [csrB, truC, yqcA, yqcC]                                                       | Repression |       |
| 2940499 | 2940974 | 8.93  | - | [gcvA]                                                                         | N/D        |       |
| 2940499 | 2940974 | 8.93  | + | [gcvB]                                                                         | Activation |       |
| 3125852 | 3126560 | 9.5   | + | [glcC]                                                                         | Repression |       |

|         |         |        |   |                                                        |            |       |
|---------|---------|--------|---|--------------------------------------------------------|------------|-------|
| 3125852 | 3126560 | 9.5    | - | [glcA, glcB, glcD, glcE, glcF, glcG]                   | Repression | Known |
| 3144302 | 3144752 | 3.03   | - | [hybA, hybB, hybC, hybD, hybE, hybF, hybG, hybO, vqhW] | Activation |       |
| 3208503 | 3209120 | 9.59   | - | [ygjD]                                                 | N/D        |       |
| 3208503 | 3209120 | 9.59   | + | [dnaG, rpoD, rpsU]                                     | Activation |       |
| 3216816 | 3217970 | 56.79  | + | [ygjG]                                                 | N/D        |       |
| 3216816 | 3217970 | 56.79  | - | [aer]                                                  | Repression |       |
| 3229492 | 3229925 | 11.27  | + | [fadH]                                                 | Repression | Known |
| 3237429 | 3238167 | 12.24  | + | [sstT]                                                 | Activation |       |
| 3242529 | 3242792 | 4.06   | + | [exuT]                                                 | N/D        |       |
| 3242529 | 3242792 | 4.06   | - | [uxaA, uxaC]                                           | Repression |       |
| 3306347 | 3306826 | 8.51   | - | [nlpI]                                                 | Activation |       |
| 3309193 | 3309930 | 9.77   | - | [pnp, rpsO]                                            | N/D        |       |
| 3309193 | 3309930 | 9.77   | + | [psrO]                                                 | N/D        |       |
| 3316172 | 3316576 | 8.7    | + | [argG]                                                 | N/D        |       |
| 3316172 | 3316576 | 8.7    | - | [infB, metY, nusA, pnp, rbfA, rimP, rpsO, truB]        | Activation |       |
| 3320118 | 3320918 | 18.9   | - | [leuU, secG]                                           | Activation |       |
| 3331135 | 3331514 | 7.54   | - | [rplU, rpmA]                                           | Activation |       |
| 3351922 | 3352747 | 14.07  | - | [yhcC]                                                 | N/D        |       |
| 3351922 | 3352747 | 14.07  | + | [gltB, gltD, gltF]                                     | N/D        |       |
| 3382354 | 3383246 | 10.32  | + | [argR]                                                 | Activation |       |
| 3382354 | 3383246 | 10.32  | - | [mdh]                                                  | Repression | Known |
| 3524059 | 3524713 | 7.17   | - | [nudE]                                                 | Repression |       |
| 3524059 | 3524713 | 7.17   | + | [yrfF]                                                 | Activation |       |
| 3530384 | 3530763 | 3.76   | + | [pck]                                                  | N/D        |       |
| 3530384 | 3530763 | 3.76   | - | [yhgE]                                                 | Activation |       |
| 3537768 | 3538389 | 6.28   | + | [feoA, feoB, feoC]                                     | Repression |       |
| 3559725 | 3560000 | 3.37   | + | [glpD]                                                 | Repression | Known |
| 3559725 | 3560000 | 3.37   | - | [glpE, glpG, glpR]                                     | conflict   |       |
| 3590129 | 3590604 | 9.42   | - | [ugpA, ugpB, ugpC, ugpE, ugpQ]                         | Repression |       |
| 3628633 | 3629217 | 6.86   | - | [rbbA, yhhJ, yhiI]                                     | Activation |       |
| 3663691 | 3664091 | 6.23   | - | [gadW, gadX]                                           | Activation | Known |
| 3671224 | 3673895 | 203.32 | + | [yhjE]                                                 | Repression |       |
| 3705383 | 3706208 | 11.88  | - | [dppA, dppB, dppC, dppD, dppF]                         | Repression |       |
| 3710141 | 3710558 | 8.83   | - | [yhjX]                                                 | N/D        |       |
| 3717470 | 3718158 | 12.02  | + | [cspA, yiaG]                                           | Repression |       |
| 3774832 | 3775395 | 11.22  | + | [lldD, lldP, lldR]                                     | Repression | Known |
| 3809457 | 3810128 | 10.37  | - | [mutM, rpmB, rpmG]                                     | Activation |       |
| 3882060 | 3882705 | 13.25  | + | [rnpA, rpmH]                                           | Activation |       |
| 3882060 | 3882705 | 13.25  | - | [dnaA, dnaN, recF]                                     | N/D        |       |
| 3891506 | 3892056 | 5.19   | + | [yieE, yieF]                                           | Repression |       |
| 3963762 | 3964341 | 11.45  | - | [rhlB]                                                 | Repression |       |
| 3963762 | 3964341 | 11.45  | + | [rho, rhoL, trxA]                                      | Activation |       |
| 4028951 | 4029389 | 6.33   | + | [hemG, pepQ, trkH, yigZ]                               | Repression |       |
| 4028951 | 4029389 | 6.33   | - | [fadA, fadB]                                           | Repression | Known |
| 4158474 | 4159090 | 10.7   | + | [fabR, yijD]                                           | Activation |       |
| 4158474 | 4159090 | 10.7   | - | [sthA]                                                 | Repression |       |
| 4194017 | 4194596 | 9.12   | - | [thiC, thiE, thiF, thiG, thiH, thiS]                   | Repression |       |
| 4285290 | 4285644 | 8.49   | + | [nrfA, nrfB, nrfC, nrfD, nrfE, nrfF, nrfG]             | Activation |       |
| 4285290 | 4285644 | 8.49   | - | [acs, actP, yjch]                                      | Repression |       |
| 4346724 | 4347078 | 5.33   | - | [dcuB, fumB]                                           | N/D        |       |
| 4364658 | 4365071 | 12.53  | - | [dcuA]                                                 | Activation |       |
| 4427296 | 4427950 | 26.83  | + | [cycA]                                                 | Repression |       |
| 4569507 | 4569903 | 12.53  | + | [yjiS]                                                 | N/D        |       |
| 4569507 | 4569903 | 12.53  | - | [yjiR]                                                 | Repression |       |
| 4637994 | 4639032 | 23.97  | + | [yjiY]                                                 | N/D        |       |
| 4637994 | 4639032 | 23.97  | - | [arcA]                                                 | Activation |       |
