# Supplementary material for: Determining the Control Circuitry of Redox Metabolism at the Genome-Scale
Source: PubMed Central journal article supplement (PMC3974632; doi:10.1371/journal.pgen.1004264), 2014-04-03
Supplement: pgen.1004264.s011.pdf [file pgen.1004264.s011.pdf]

**Supplementary Table 3. Fnr-associated regions under fermentative conditions identified by ChIP-chip analysis and its regulatory effect on the target operons determined by expression profiles.** This table summarizes the results of ChIP-chip experiments to determine the genome-wide locations of DNA targets for Fnr binding in exponential phase *E. coli* cells growing in strictly anaerobic minimal media conditions. First and second columns indicate identified Fnr-binding peaks (Start: left-end peak position, End: right-end peak position). The third column indicates the log<sub>2</sub> ratio of each Fnr-binding peak.

| Peak start | Peak end | Occupancy | Strand | Operon                         | Regulation | Regulon |
|------------|----------|-----------|--------|--------------------------------|------------|---------|
| 22         | 426      | 14.1      | +      | [thrA, thrB, thrC, thrL]       | Activation |         |
| 33664      | 34016    | 4.36      | +      | [caiF]                         | Activation | Known   |
| 121581     | 122493   | 37.33     | +      | [aceE, aceF, lpd, pdhR]        | Repression | Known   |
| 121581     | 122493   | 37.33     | -      | [aroP]                         | Activation |         |
| 222754     | 222983   | 2.31      | -      | [metI, metN, metQ]             | Activation |         |
| 222754     | 222983   | 2.31      | +      | [gmhB]                         | N/D        |         |
| 400018     | 400376   | 5.4       | +      | [iraP]                         | Repression |         |
| 400018     | 400376   | 5.4       | -      | [ddlA]                         | Repression |         |
| 579629     | 579977   | 5.72      | +      | [nohB]                         | N/D        |         |
| 770097     | 770680   | 21.85     | +      | [cydA, cydB]                   | Repression | Known   |
| 815945     | 816229   | 6.18      | -      | [ybhK]                         | N/D        |         |
| 815945     | 816229   | 6.18      | +      | [moaA, moaB, moaC, moaD, moaE] | Activation | Known   |
| 854877     | 855223   | 5.81      | +      | [ybiT]                         | N/D        |         |
| 854877     | 855223   | 5.81      | -      | [ybiS]                         | Repression |         |
| 862561     | 863006   | 4.06      | -      | [ybiW, ybiY]                   | N/D        |         |
| 862561     | 863006   | 4.06      | +      | [fsaA]                         | N/D        |         |
| 877230     | 877764   | 18.86     | +      | [bssR]                         | Activation |         |
| 877230     | 877764   | 18.86     | -      | [rimO]                         | N/D        |         |
| 915184     | 915551   | 4.9       | -      | [aqpZ]                         | N/D        |         |
| 915184     | 915551   | 4.9       | +      | [ybjD]                         | N/D        |         |
| 929843     | 930127   | 2.35      | -      | [cydC, cydD]                   | Repression | Known   |
| 939760     | 940277   | 8.66      | +      | [dmsA, dmsB, dmsC]             | Activation | Known   |
| 953406     | 954037   | 25.12     | -      | [focA, pflB]                   | Activation | Known   |
| 1003698    | 1004086  | 11.66     | +      | [pyrD]                         | Activation |         |
| 1156969    | 1157306  | 4.58      | +      | [ptsG]                         | Activation |         |
| 1249958    | 1250388  | 8.05      | -      | [dhaK, dhaL, dhaM]             | Activation |         |
| 1249958    | 1250388  | 8.05      | +      | [dhaR]                         | N/D        |         |
| 1276714    | 1276968  | 2.47      | +      | [narK]                         | N/D        | Known   |
| 1276714    | 1276968  | 2.47      | -      | [narL, narX]                   | Activation | Known   |
| 1278930    | 1279184  | 3.95      | +      | [narG, narH, narI, narJ]       | Activation | Known   |
| 1297064    | 1298014  | 43.41     | -      | [adhE]                         | Activation | Known   |
| 1297064    | 1298014  | 43.41     | +      | [ychE]                         | N/D        |         |
| 1311573    | 1312065  | 9.82      | +      | [ompW]                         | N/D        | Known   |
| 1311573    | 1312065  | 9.82      | -      | [yciB, yciC]                   | N/D        |         |
| 1397425    | 1397801  | 5.97      | -      | [fnr]                          | Activation | Known   |
| 1406606    | 1407751  | 57.16     | +      | [dbpA, fnrS]                   | N/D        |         |
| 1433809    | 1434164  | 4.34      | -      | [uspF]                         | Activation |         |
| 1514693    | 1515851  | 55.69     | +      | [ydcX, ydcY]                   | N/D        |         |
| 1514693    | 1515851  | 55.69     | -      | [yncl]                         | N/D        |         |
| 1545268    | 1545543  | 6.22      | +      | [fdnG, fdnH, fdnI]             | N/D        | Known   |
| 1545268    | 1545543  | 6.22      | -      | [yddG]                         | N/D        |         |
| 1608609    | 1608992  | 7.06      | -      | [uxaB]                         | N/D        |         |
| 1627076    | 1627334  | 7.04      | +      | [ydfZ]                         | Activation |         |
| 1634523    | 1634804  | 5.29      | -      | [nohA, tfaQ, ydfN]             | N/D        |         |
| 1634523    | 1634804  | 5.29      | +      | [ydfO, ynfO]                   | N/D        |         |
| 1655846    | 1656200  | 3.67      | +      | [dmsD, ynfE, ynfF, ynfG, ynfH] | Activation | Known   |
| 1664954    | 1665609  | 25.27     | -      | [ynfK]                         | Activation |         |
| 1717589    | 1717980  | 5.18      | -      | [anmK]                         | N/D        |         |
| 1717589    | 1717980  | 5.18      | +      | [slyB]                         | N/D        |         |
| 1718564    | 1719676  | 55.45     | -      | [slyA]                         | N/D        |         |

|         |         |       |   |                                                                                |            |       |
|---------|---------|-------|---|--------------------------------------------------------------------------------|------------|-------|
| 1718564 | 1719676 | 55.45 | + | [ydhI, ydhJ, ydhK]                                                             | N/D        |       |
| 1752229 | 1752712 | 5.61  | - | [ydhT, ydhU, ydhV, ydhW, ydhX, ydhY]                                           | Activation | Known |
| 1830936 | 1831736 | 8.95  | + | [ydjX, ydjY, ydjZ, ynjA, ynjB, ynjC, ynjD]                                     | N/D        |       |
| 1837249 | 1837857 | 7.7   | + | [ynjE]                                                                         | Activation |       |
| 1860528 | 1860849 | 7.43  | - | [msrB]                                                                         | Repression |       |
| 1860528 | 1860849 | 7.43  | + | [gapA, yeaD]                                                                   | Activation |       |
| 1868390 | 1868661 | 5.34  | + | [yeaI]                                                                         | N/D        |       |
| 1935038 | 1936071 | 49.24 | + | [pykA]                                                                         | Activation |       |
| 1987416 | 1987641 | 5.43  | - | [yecH]                                                                         | Activation |       |
| 1987416 | 1987641 | 5.43  | + | [tyrP]                                                                         | N/D        |       |
| 2006399 | 2006691 | 2.74  | + | [yedE, yedF]                                                                   | Repression |       |
| 2263835 | 2264310 | 8.31  | + | [yeiQ]                                                                         | N/D        |       |
| 2342209 | 2342718 | 9.16  | - | [yfaL]                                                                         | N/D        |       |
| 2342209 | 2342718 | 9.16  | + | [nrdA, nrdB, yfaE]                                                             | Repression |       |
| 2363905 | 2364372 | 5.67  | + | [arnA, arnB, arnC, arnD, arnE, arnF, arnT]                                     | Repression |       |
| 2403298 | 2403613 | 8.35  | - | [nuoA, nuoB, nuoC, nuoE, nuoF, nuoG, nuoH, nuol, nuoJ, nuoK, nuoL, nuoM, nuoN] | Activation | Known |
| 2411077 | 2411786 | 29.13 | + | [ackA, pta]                                                                    | Activation | Known |
| 2411077 | 2411786 | 29.13 | - | [yfbV]                                                                         | Activation |       |
| 2414873 | 2415198 | 7.73  | + | [yfcC]                                                                         | N/D        |       |
| 2458993 | 2459343 | 6.04  | - | [yfcZ]                                                                         | Activation |       |
| 2458993 | 2459343 | 6.04  | + | [fadL]                                                                         | N/D        |       |
| 2558286 | 2558519 | 4     | + | [yffL]                                                                         | N/D        |       |
| 2561320 | 2561654 | 5.81  | + | [yffQ, yffR]                                                                   | N/D        |       |
| 2562241 | 2562791 | 18.73 | + | [yffS]                                                                         | Repression |       |
| 2618825 | 2619146 | 6.78  | + | [purM, purN]                                                                   | Activation | Known |
| 2618825 | 2619146 | 6.78  | - | [upp, uraA]                                                                    | Activation | Known |
| 2632029 | 2632437 | 6.67  | - | [guaA, guaB]                                                                   | Activation |       |
| 2632029 | 2632437 | 6.67  | + | [xseA]                                                                         | N/D        |       |
| 2713973 | 2715190 | 58.62 | + | [ung]                                                                          | Activation |       |
| 2713973 | 2715190 | 58.62 | - | [yfiD]                                                                         | Activation | Known |
| 2890562 | 2890817 | 5.1   | + | [ygcN, ygcO, ygcP]                                                             | N/D        |       |
| 2945028 | 2945524 | 14.13 | + | [metV, metW, metZ]                                                             | Activation |       |
| 2945028 | 2945524 | 14.13 | - | [mltA]                                                                         | Activation |       |
| 3144260 | 3144589 | 11.19 | - | [hybA, hybB, hybC, hybD, hybE, hybF, hybG, hybO, vqhW]                         | Activation |       |
| 3151464 | 3151697 | 4.26  | + | [yghB]                                                                         | Activation |       |
| 3242629 | 3243193 | 19.34 | - | [uxaA, uxaC]                                                                   | N/D        | Known |
| 3242629 | 3243193 | 19.34 | + | [exuT]                                                                         | N/D        |       |
| 3265477 | 3265748 | 3.64  | + | [tdcR, yhaB, yhaC]                                                             | N/D        |       |
| 3273154 | 3273500 | 5.94  | - | [garK, garL, garP, garR, rnpB]                                                 | N/D        | Known |
| 3273154 | 3273500 | 5.94  | + | [garD]                                                                         | N/D        |       |
| 3299318 | 3299760 | 7.37  | + | [yhbU, yhbV]                                                                   | Activation |       |
| 3299318 | 3299760 | 7.37  | - | [yhbS, yhbT]                                                                   | Activation |       |
| 3351968 | 3352343 | 6.32  | + | [gltB, gltD, gltF]                                                             | N/D        | Known |
| 3351968 | 3352343 | 6.32  | - | [yhcC]                                                                         | N/D        |       |
| 3491858 | 3492242 | 5.75  | + | [cysG, nirB, nirC, nirD]                                                       | Activation | Known |
| 3572961 | 3573386 | 7.17  | - | [asd]                                                                          | N/D        |       |
| 3572961 | 3573386 | 7.17  | + | [yhgN]                                                                         | N/D        |       |
| 3611421 | 3611733 | 6.6   | + | [nikA, nikB, nikC, nikD, nikE, nikR]                                           | Activation | Known |
| 3635513 | 3635921 | 4.74  | + | [pitA]                                                                         | Activation | Known |
| 3635513 | 3635921 | 4.74  | - | [yhiN]                                                                         | N/D        |       |
| 3637554 | 3638025 | 5.57  | + | [uspA]                                                                         | N/D        |       |
| 3637554 | 3638025 | 5.57  | - | [uspB]                                                                         | Repression |       |
| 3782782 | 3783328 | 6.56  | - | [yibN]                                                                         | Activation |       |
| 3782782 | 3783328 | 6.56  | + | [envC, gpmM, yibQ]                                                             | Activation |       |

|         |         |      |   |                                            |            |       |
|---------|---------|------|---|--------------------------------------------|------------|-------|
| 3929133 | 3929421 | 3.21 | - | [ravA, viaA]                               | Activation |       |
| 3929133 | 3929421 | 3.21 | + | [kup]                                      | N/D        |       |
| 4131553 | 4131899 | 4.29 | + | [katG]                                     | Activation | Known |
| 4285636 | 4285952 | 3.78 | - | [acs, actP, yjcH]                          | N/D        |       |
| 4285636 | 4285952 | 3.78 | + | [nrfA, nrfB, nrfC, nrfD, nrfE, nrfF, nrfG] | Activation | Known |
| 4368267 | 4368629 | 4.39 | + | [groL, groS]                               | Repression |       |
| 4368267 | 4368629 | 4.39 | - | [yjeH]                                     | N/D        |       |
| 4380104 | 4380617 | 6.2  | - | [frdA, frdB, frdC, frdD]                   | Activation | Known |
| 4380104 | 4380617 | 6.2  | + | [poxA]                                     | N/D        |       |
| 4402547 | 4402859 | 5.1  | + | [purA, yjeT]                               | Activation |       |
| 4460936 | 4461436 | 5.15 | - | [nrdD, nrdG]                               | Activation | Known |
| 4638482 | 4638719 | 3.06 | - | [arcA]                                     | N/D        | Known |
| 4638482 | 4638719 | 3.06 | + | [yjjY]                                     | N/D        |       |
