# Supplementary material for: Determining the Control Circuitry of Redox Metabolism at the Genome-Scale
Source: PubMed Central journal article supplement (PMC3974632; doi:10.1371/journal.pgen.1004264), 2014-04-03
Supplement: pgen.1004264.s012.pdf [file pgen.1004264.s012.pdf]

**Supplementary Table 4. Fnr-associated regions under nitrate respiratory conditions identified by ChIP-chip analysis and its regulatory effect on the target operons determined by expression profiles.** This table summarizes the results of ChIP-chip experiments to determine the genome-wide locations of DNA targets for Fnr binding in exponential phase *E. coli* cells growing in strictly anaerobic minimal media with the addition of 20mM KNO<sub>3</sub>. First and second columns indicate identified Fnr-binding peaks (Start: left-end peak position, End: right-end peak position). The third column indicates the log<sub>2</sub> ratio of each Fnr-binding peak.

| Peak start | Peak end | Occupancy | Strand | Operon                                     | Regulation | Regulon DB |
|------------|----------|-----------|--------|--------------------------------------------|------------|------------|
| 26         | 226      | 4.97      | +      | [thrA, thrB, thrC, thrL]                   | Activation |            |
| 121564     | 122410   | 30.6      | -      | [aroP]                                     | Activation |            |
| 121564     | 122410   | 30.6      | +      | [aceE, aceF, lpd, pdhR]                    | N/D        | Known      |
| 236760     | 237227   | 5.33      | +      | [aspV, yafT]                               | N/D        |            |
| 579604     | 579842   | 3.82      | +      | [nohB]                                     | N/D        |            |
| 695756     | 696406   | 9.89      | -      | [glnU, glnV, glnW, glnX, leuW, metT, metU] | N/D        |            |
| 770355     | 770567   | 5.48      | +      | [cydA, cydB]                               | Repression | Known      |
| 815320     | 816641   | 59.73     | -      | [ybhK]                                     | N/D        |            |
| 815320     | 816641   | 59.73     | +      | [moaA, moaB, moaC, moaD, moaE]             | Activation | Known      |
| 855031     | 855452   | 5.87      | -      | [ybiS]                                     | Repression |            |
| 855031     | 855452   | 5.87      | +      | [ybiT]                                     | Activation |            |
| 862543     | 862976   | 4.08      | -      | [ybiW, ybiY]                               | N/D        |            |
| 862543     | 862976   | 4.08      | +      | [fsaA]                                     | N/D        |            |
| 876814     | 878039   | 50.27     | +      | [bssR]                                     | Activation |            |
| 876814     | 878039   | 50.27     | -      | [rimO]                                     | Activation |            |
| 913001     | 913501   | 7.74      | -      | [hcp, hcr]                                 | Activation | Known      |
| 915063     | 915834   | 8.71      | -      | [aqpZ]                                     | N/D        |            |
| 915063     | 915834   | 8.71      | +      | [ybjD]                                     | N/D        |            |
| 953498     | 953789   | 7.98      | -      | [focA, pflB]                               | N/D        | Known      |
| 1003869    | 1004148  | 5.92      | +      | [pyrD]                                     | Activation |            |
| 1156535    | 1157177  | 7.77      | +      | [ptsG]                                     | Activation |            |
| 1184805    | 1185388  | 4.58      | +      | [pepT]                                     | Activation | Known      |
| 1184805    | 1185388  | 4.58      | -      | [potA, potB, potC, potD]                   | Activation |            |
| 1276906    | 1277366  | 6.31      | +      | [narK]                                     | Activation | Known      |
| 1276906    | 1277366  | 6.31      | -      | [narL, narX]                               | Activation | Known      |
| 1278180    | 1279764  | 73.67     | +      | [narG, narH, narI, narJ]                   | Activation | Known      |
| 1296968    | 1298072  | 47.48     | +      | [ychE]                                     | N/D        |            |
| 1296968    | 1298072  | 47.48     | -      | [adhE]                                     | Repression | Known      |
| 1311760    | 1312152  | 6.02      | -      | [yciB, yciC]                               | N/D        |            |
| 1311760    | 1312152  | 6.02      | +      | [ompW]                                     | N/D        | Known      |
| 1397471    | 1397939  | 8.53      | -      | [fnr]                                      | Activation | Known      |
| 1406401    | 1407831  | 63.7      | +      | [fnrS]                                     | N/D        |            |
| 1514839    | 1515743  | 32.76     | +      | [ydcX, ydcY]                               | Activation |            |
| 1514839    | 1515743  | 32.76     | -      | [yncl]                                     | N/D        |            |
| 1544314    | 1546189  | 106.67    | -      | [yddG]                                     | N/D        |            |
| 1544314    | 1546189  | 106.67    | +      | [fdnG, fdnH, fdnI]                         | Activation | Known      |
| 1608517    | 1608938  | 6.67      | -      | [uxaB]                                     | N/D        |            |
| 1627005    | 1627617  | 18.59     | +      | [ydfZ]                                     | Activation |            |
| 1634571    | 1634863  | 5.26      | +      | [ydfO, ynfO]                               | Activation |            |
| 1634571    | 1634863  | 5.26      | -      | [nohA, tfaQ, ydfN]                         | N/D        |            |
| 1664692    | 1665946  | 53.84     | -      | [ynfK]                                     | Activation |            |
| 1718130    | 1720026  | 100.59    | -      | [slyA]                                     | N/D        |            |
| 1718130    | 1720026  | 100.59    | +      | [ydhI, ydhJ, ydhK]                         | Activation |            |
| 1831161    | 1831557  | 5.56      | +      | [ydjX, ydjY, ydjZ, ynjA, ynjB, ynjC, ynjD] | Activation |            |
| 1837153    | 1837632  | 4.05      | +      | [ynjE]                                     | Activation |            |
| 1860499    | 1860832  | 8.55      | +      | [gapA, yeaD]                               | Activation |            |
| 1860499    | 1860832  | 8.55      | -      | [msrB]                                     | N/D        |            |
| 1934600    | 1936308  | 88.12     | +      | [pykA]                                     | Activation |            |

|         |         |       |   |                                                                                |            |       |
|---------|---------|-------|---|--------------------------------------------------------------------------------|------------|-------|
| 1987357 | 1987603 | 6.06  | + | [tyrP]                                                                         | Repression |       |
| 1987357 | 1987603 | 6.06  | - | [yecH]                                                                         | Activation |       |
| 2066085 | 2066718 | 10.16 | + | [yoeA]                                                                         | N/D        |       |
| 2263926 | 2264272 | 4.83  | + | [yeiQ]                                                                         | N/D        |       |
| 2403344 | 2403602 | 6.48  | - | [nuoA, nuoB, nuoC, nuoE, nuoF, nuoG, nuoH, nuol, nuoJ, nuoK, nuoL, nuoM, nuoN] | Activation | Known |
| 2410977 | 2412073 | 46.04 | - | [yfbV]                                                                         | N/D        |       |
| 2410977 | 2412073 | 46.04 | + | [ackA, pta]                                                                    | Activation | Known |
| 2414940 | 2415461 | 6.67  | + | [yfcC]                                                                         | Activation |       |
| 2458905 | 2459376 | 4.29  | + | [fadL]                                                                         | N/D        |       |
| 2458905 | 2459376 | 4.29  | - | [yfcZ]                                                                         | Activation |       |
| 2558440 | 2558665 | 5.59  | + | [yffL]                                                                         | Repression |       |
| 2562237 | 2562725 | 11.83 | + | [yffS]                                                                         | Activation |       |
| 2618942 | 2619273 | 3.23  | + | [purM, purN]                                                                   | Activation | Known |
| 2618942 | 2619273 | 3.23  | - | [upp, uraA]                                                                    | Activation | Known |
| 2632000 | 2632387 | 8.93  | - | [guaA, guaB]                                                                   | Activation |       |
| 2632000 | 2632387 | 8.93  | + | [xseA]                                                                         | Activation |       |
| 2713953 | 2715153 | 48.39 | - | [yfiD]                                                                         | Activation | Known |
| 2713953 | 2715153 | 48.39 | + | [ung]                                                                          | N/D        |       |
| 2890525 | 2890817 | 4.66  | + | [ygcN, ygcO, ygcP]                                                             | N/D        |       |
| 2907727 | 2908047 | 4.22  | - | [eno, pyrG]                                                                    | Repression |       |
| 2922168 | 2922822 | 8.51  | - | [csrB, truC, yqcA, yqcC]                                                       | Repression |       |
| 2945182 | 2945724 | 16.82 | - | [mltA]                                                                         | N/D        |       |
| 2945182 | 2945724 | 16.82 | + | [metV, metW, metZ]                                                             | N/D        |       |
| 3084255 | 3084560 | 4.53  | + | [metK, yqgC]                                                                   | Activation |       |
| 3084255 | 3084560 | 4.53  | - | [speA, speB, yqgB, yqgD]                                                       | N/D        |       |
| 3144135 | 3144760 | 21.44 | - | [hybA, hybB, hybC, hybD, hybE, hybF, hybG, hybO, yahW]                         | Activation |       |
| 3147210 | 3147781 | 3.95  | + | [yghA]                                                                         | Repression |       |
| 3147210 | 3147781 | 3.95  | - | [yqhA]                                                                         | N/D        |       |
| 3151364 | 3151772 | 9.42  | + | [yghB]                                                                         | N/D        |       |
| 3242534 | 3242884 | 9.62  | - | [uxaA, uxaC]                                                                   | Activation | Known |
| 3242534 | 3242884 | 9.62  | + | [exuT]                                                                         | N/D        |       |
| 3299330 | 3299672 | 6.43  | + | [yhbU, yhbV]                                                                   | Activation |       |
| 3299330 | 3299672 | 6.43  | - | [yhbS, yhbT]                                                                   | Activation |       |
| 3316235 | 3316635 | 6.15  | - | [infB, metY, nusA, pnp, rbfA, rimP, rpsO, truB]                                | Activation |       |
| 3316235 | 3316635 | 6.15  | + | [argG]                                                                         | N/D        |       |
| 3320151 | 3320668 | 6.24  | - | [leuU, secG]                                                                   | Activation |       |
| 3331189 | 3331701 | 6.94  | - | [rplU, rpmA]                                                                   | N/D        |       |
| 3331189 | 3331701 | 6.94  | + | [ispB]                                                                         | N/D        |       |
| 3352038 | 3352480 | 7.62  | + | [gltB, gltD, gltF]                                                             | N/D        | Known |
| 3352038 | 3352480 | 7.62  | - | [yhcC]                                                                         | N/D        |       |
| 3491479 | 3492542 | 40.58 | + | [cysG, nirB, nirC, nirD]                                                       | Activation | Known |
| 3611367 | 3611767 | 3.6   | + | [nikA, nikB, nikC, nikD, nikE, nikR]                                           | Activation | Known |
| 3635392 | 3635729 | 7.54  | - | [yhiN]                                                                         | N/D        |       |
| 3635392 | 3635729 | 7.54  | + | [pitA]                                                                         | Activation | Known |
| 3637692 | 3638108 | 5.71  | - | [uspB]                                                                         | Repression |       |
| 3637692 | 3638108 | 5.71  | + | [uspA]                                                                         | Repression |       |
| 3882047 | 3882601 | 7.49  | - | [dnaA, dnaN, recF]                                                             | Activation |       |
| 3882047 | 3882601 | 7.49  | + | [rnpA, rpmH]                                                                   | Activation |       |
| 3929016 | 3929641 | 8.36  | - | [ravA, viaA]                                                                   | Activation |       |
| 3929016 | 3929641 | 8.36  | + | [kup]                                                                          | N/D        |       |
| 4131332 | 4131662 | 6.68  | + | [katG]                                                                         | Activation | Known |
| 4285448 | 4285982 | 4.94  | + | [nrfA, nrfB, nrfC, nrfD, nrfE, nrfF, nrfG]                                     | Activation | Known |
| 4285448 | 4285982 | 4.94  | - | [acs, actP, yjch]                                                              | N/D        |       |
| 4402434 | 4402838 | 7.42  | + | [purA, yjeT]                                                                   | Activation |       |
| 4584625 | 4584929 | 3.65  | - | [hsdM, hsdR, hsdS]                                                             | Activation |       |

|         |         |       |   |                          |            |       |
|---------|---------|-------|---|--------------------------|------------|-------|
| 4584625 | 4584929 | 3.65  | + | [mrr]                    | N/D        |       |
| 4603825 | 4604367 | 9.28  | + | [yjjZ]                   | N/D        |       |
| 4603825 | 4604367 | 9.28  | - | [fhuF, leuP, leuQ, leuV] | Repression |       |
| 4638344 | 4639019 | 11.39 | + | [yjjY]                   | N/D        |       |
| 4638344 | 4639019 | 11.39 | - | [arcA]                   | Activation | Known |
