# Supplementary material for: Determining the Control Circuitry of Redox Metabolism at the Genome-Scale
Source: PubMed Central journal article supplement (PMC3974632; doi:10.1371/journal.pgen.1004264), 2014-04-03
Supplement: pgen.1004264.s013.pdf [file pgen.1004264.s013.pdf]

**Supplementary Table 5.** ArcA motifs found underneath experimentally determined ChIP binding regions. First column is the center position of the peak (averaged for peaks occurring under both fermentative and nitrate respiratory conditions).

| Peak center | Operon                                                 | Motif start | Motif end | Sequence         | P-val    | Strand |
|-------------|--------------------------------------------------------|-------------|-----------|------------------|----------|--------|
| 150         | [thrA, thrB, thrC, thrL]                               | 99          | 113       | ATTAAAATTTTATTG  | 6.28E-05 | -      |
| 29420       | [carA, carB]                                           | 29341       | 29355     | GTTGTTTTAATGTAA  | 9.60E-06 | -      |
| 41890       | [caiA, caiB, caiC, caiD, caiE, caiT]                   | 41979       | 41993     | GTTTTATTTTTGTTA  | 8.94E-06 | -      |
| 41890       | [caiA, caiB, caiC, caiD, caiE, caiT]                   | 41992       | 42006     | TAACATTTAATATAA  | 2.72E-05 | +      |
| 121924      | [aceE, aceF, aroP, lpd, pdhR]                          | 121624      | 121638    | TATTAATTTGTTTAC  | 1.63E-05 | +      |
| 121924      | [aceE, aceF, aroP, lpd, pdhR]                          | 121870      | 121884    | GTTTAATAATCGTTA  | 1.42E-06 | -      |
| 121924      | [aceE, aceF, aroP, lpd, pdhR]                          | 121924      | 121938    | GTTACAACCTTTGAAA | 7.43E-05 | -      |
| 121924      | [aceE, aceF, aroP, lpd, pdhR]                          | 121925      | 121939    | TTACAACCTTTGAAAC | 5.12E-05 | +      |
| 121924      | [aceE, aceF, aroP, lpd, pdhR]                          | 122009      | 122023    | GTGAATACTTTGTTA  | 7.22E-06 | -      |
| 127841      | [lpd]                                                  | 127681      | 127695    | GTTTAAAAATTGTTA  | 1.52E-07 | -      |
| 127841      | [lpd]                                                  | 127683      | 127697    | TTAAAAATTGTTAAC  | 2.22E-05 | +      |
| 127841      | [lpd]                                                  | 127694      | 127708    | TAACAATTTTGTAAC  | 2.81E-06 | +      |
| 131448      | [acnB, yacH]                                           | 131399      | 131413    | TAACGAAGTTTTTAC  | 8.40E-06 | +      |
| 131448      | [acnB, yacH]                                           | 131464      | 131478    | GTTGCTTTTTTGTA   | 3.07E-05 | -      |
| 243379      | [fadE, lpcA]                                           | 243376      | 243390    | TAGCAATATGTTTAC  | 1.31E-05 | +      |
| 243379      | [fadE, lpcA]                                           | 243387      | 243401    | TTACAATATAATTAC  | 5.35E-06 | +      |
| 450990      | [cyoA, cyoB, cyoC, cyoD, cyoE]                         | 450897      | 450911    | GTTACATTACTGTAA  | 3.87E-05 | -      |
| 450990      | [cyoA, cyoB, cyoC, cyoD, cyoE]                         | 451070      | 451084    | AAACAATTATTTAAC  | 2.63E-07 | +      |
| 450990      | [cyoA, cyoB, cyoC, cyoD, cyoE]                         | 451079      | 451093    | TTTAACAAATAATTA  | 7.46E-06 | -      |
| 450990      | [cyoA, cyoB, cyoC, cyoD, cyoE]                         | 451081      | 451095    | TAACAAATAATTATC  | 9.56E-05 | +      |
| 579763      | [nohB]                                                 | 579712      | 579726    | GTTGTTTTTACGTTA  | 2.00E-05 | -      |
| 728180      | [kdpA, kdpB, kdpC, kdpF, ybfA]                         | 728128      | 728142    | GTAAAAAAGTATAA   | 8.15E-05 | -      |
| 728180      | [kdpA, kdpB, kdpC, kdpF, ybfA]                         | 728161      | 728175    | TTTAACATAATGTTTA | 8.88E-05 | -      |
| 728180      | [kdpA, kdpB, kdpC, kdpF, ybfA]                         | 728185      | 728199    | TAACTTTTGTGTAAC  | 1.44E-05 | +      |
| 754402      | [sdhA, sdhB, sdhC, sdhD, sucA, sucB, sucC, sucD]       | 753963      | 753977    | GTTAATCTTAGGTGA  | 9.10E-05 | -      |
| 754307      | [gltA, sdhA, sdhB, sdhC, sdhD, sucA, sucB, sucC, sucD] | 754029      | 754043    | GTAACAACCTTTGTTG | 3.97E-05 | -      |
| 754307      | [gltA, sdhA, sdhB, sdhC, sdhD, sucA, sucB, sucC, sucD] | 754332      | 754346    | TAACAGAAAGTTAAC  | 9.43E-06 | +      |
| 770285      | [cydA, cydB]                                           | 770047      | 770061    | TAACAAAATAATAAC  | 5.44E-07 | +      |
| 770285      | [cydA, cydB]                                           | 770084      | 770098    | TAATTATAAGTTAAC  | 1.46E-05 | +      |
| 770285      | [cydA, cydB]                                           | 770093      | 770107    | GTTAACTAAATGTTA  | 1.34E-08 | -      |
| 770285      | [cydA, cydB]                                           | 770095      | 770109    | TAACATAAATGTTAAT | 8.40E-06 | +      |
| 770355      | [cydA, cydB]                                           | 770264      | 770278    | TCACACATTTTAAAC  | 1.03E-05 | +      |
| 770355      | [cydA, cydB]                                           | 770275      | 770289    | AAACATAAATGTCAC  | 8.23E-05 | +      |
| 770355      | [cydA, cydB]                                           | 770294      | 770308    | GTTACCTTATTGAAA  | 6.03E-05 | -      |
| 770355      | [cydA, cydB]                                           | 770295      | 770309    | TTACCTTATTGAAAC  | 5.41E-05 | +      |
| 770355      | [cydA, cydB]                                           | 770496      | 770510    | GTAATATATACGTGG  | 7.43E-05 | -      |
| 770355      | [cydA, cydB]                                           | 770525      | 770539    | TTTATTAACATGTTT  | 9.56E-05 | -      |
| 770355      | [cydA, cydB]                                           | 770530      | 770544    | TAACATGTTTGCAAC  | 1.54E-05 | +      |
| 858444      | [ybiU]                                                 | 858342      | 858356    | GTTATAAATAAGTTA  | 7.38E-07 | -      |
| 892706      | [potF, potG, potH, potI]                               | 892722      | 892736    | TAACCTTTTCTTAAA  | 4.59E-05 | +      |
| 892706      | [potF, potG, potH, potI]                               | 892792      | 892806    | TAAAAATTTGTTAAA  | 7.46E-06 | +      |
| 930386      | [cydC, cydD]                                           | 930291      | 930305    | GTTACTGATTTGTAA  | 2.60E-06 | -      |
| 953676      | [focA, pflB]                                           | 953817      | 953831    | GTAAATATTTGATTA  | 1.63E-05 | -      |
| 953676      | [focA, pflB]                                           | 953895      | 953909    | AAACAGTTAATTTAAA | 7.82E-05 | +      |
| 953671      | [focA, pflB]                                           | 953964      | 953978    | TTACCGATATTTAAC  | 3.07E-05 | +      |
| 953671      | [focA, pflB]                                           | 953975      | 953989    | TAACCTTATAATTAC  | 9.60E-06 | +      |

|         |                                                                          |         |         |                  |          |   |
|---------|--------------------------------------------------------------------------|---------|---------|------------------|----------|---|
| 953671  | [focA, pflB]                                                             | 953986  | 954000  | TTACAATTATTTTAT  | 3.29E-05 | + |
| 989814  | [pepN, pncB]                                                             | 989724  | 989738  | GTTATAAAAATGTAG  | 1.30E-06 | - |
| 1015227 | [rmf]                                                                    | 1015286 | 1015300 | GTTAACAATGCGTTT  | 1.03E-05 | - |
| 1015227 | [rmf]                                                                    | 1015288 | 1015302 | TAACAATGCGTTTAA  | 1.62E-06 | + |
| 1073279 | [rutA, rutB, rutC, rutD, rutE, rutF, rutG, rutR]                         | 1073279 | 1073293 | GTTTTTAAAAAGTTA  | 2.21E-06 | - |
| 1073279 | [rutA, rutB, rutC, rutD, rutE, rutF, rutG, rutR]                         | 1073296 | 1073310 | GTTATTAATCTGTTA  | 2.21E-06 | - |
| 1073279 | [rutA, rutB, rutC, rutD, rutE, rutF, rutG, rutR]                         | 1073298 | 1073312 | TATTAATCTGTTAAC  | 1.63E-05 | + |
| 1073279 | [rutA, rutB, rutC, rutD, rutE, rutF, rutG, rutR]                         | 1073307 | 1073321 | GTTAACATTACGTTA  | 1.56E-06 | - |
| 1078409 | [putA, putP]                                                             | 1078378 | 1078392 | GTAAATGGTGTGTTA  | 5.26E-05 | - |
| 1084185 | [phoH]                                                                   | 1084107 | 1084121 | GTTAAATATAAGTAA  | 1.42E-06 | - |
| 1084185 | [phoH]                                                                   | 1084118 | 1084132 | GTAAATATATTGTTG  | 4.24E-06 | - |
| 1150977 | [acpP, fabF]                                                             | 1150777 | 1150791 | CAACATTTTATACAC  | 1.26E-05 | + |
| 1194219 | [icd, nudJ, rluE]                                                        | 1194236 | 1194250 | TTACAAATCATTAAAC | 4.86E-07 | + |
| 1232411 | [dsbB]                                                                   | 1232395 | 1232409 | GTTATCAAAGCGTTG  | 1.26E-05 | - |
| 1276988 | [narK, narL, narX]                                                       | 1277094 | 1277108 | GTTATCTTATCGTTT  | 2.41E-05 | - |
| 1276988 | [narK, narL, narX]                                                       | 1277101 | 1277115 | TATCGTTTGATTTAC  | 7.82E-05 | + |
| 1279014 | [narG, narH, narI, narJ]                                                 | 1278696 | 1278710 | GTAAAATATTTGATT  | 4.34E-05 | - |
| 1297536 | [adhE, ychE]                                                             | 1297635 | 1297649 | GTTAATAAATTGTAG  | 4.04E-07 | - |
| 1298745 | [oppA, oppB, oppC, oppD, oppF]                                           | 1298726 | 1298740 | TAATCAATTGTTAAA  | 4.11E-06 | + |
| 1298745 | [oppA, oppB, oppC, oppD, oppF]                                           | 1298883 | 1298897 | TAACAATTTTGCAA   | 3.45E-05 | + |
| 1311888 | [ompW, yciB, yciC]                                                       | 1312011 | 1312025 | TCACGTTTTTATAAC  | 1.71E-06 | + |
| 1359092 | [puuA, puuD, puuR]                                                       | 1358963 | 1358977 | GTTATCAAAGCGTAA  | 6.70E-06 | - |
| 1386765 | [tpx, ycjG]                                                              | 1386849 | 1386863 | GTTTACATATAGTTA  | 1.18E-05 | - |
| 1386765 | [tpx, ycjG]                                                              | 1386851 | 1386865 | TTACATATAGTTAAC  | 2.63E-07 | + |
| 1395504 | [ynaJ]                                                                   | 1395345 | 1395359 | TTACGTTTAGGTAAC  | 3.34E-06 | + |
| 1397659 | [fnr]                                                                    | 1397666 | 1397680 | TATCTATTTGAAAA   | 6.70E-05 | + |
| 1451846 | [maoC, paaA, paaB, paaC, paaD, paaE, paaF, paaG, paaH, paal, paaJ, paaK] | 1451738 | 1451752 | TTTAACGAAATGTTA  | 5.29E-06 | - |
| 1451846 | [maoC, paaA, paaB, paaC, paaD, paaE, paaF, paaG, paaH, paal, paaJ, paaK] | 1451740 | 1451754 | TAACGAAATGTTAAC  | 1.43E-06 | + |
| 1451846 | [maoC, paaA, paaB, paaC, paaD, paaE, paaF, paaG, paaH, paal, paaJ, paaK] | 1451869 | 1451883 | TAACTATTGTGTAAC  | 1.87E-05 | + |
| 1486199 | [aldA]                                                                   | 1486208 | 1486222 | TAACAATGTATTCAC  | 3.90E-06 | + |
| 1486199 | [aldA]                                                                   | 1486230 | 1486244 | AAACATATAAATCAC  | 1.44E-05 | + |
| 1515281 | [ydcX, ydcY, yncL]                                                       | 1515738 | 1515752 | ATGAACGAATTATTA  | 6.86E-05 | - |
| 1521104 | [yncD, yncE]                                                             | 1521128 | 1521142 | GTAATGAAATTGTAA  | 1.26E-05 | - |
| 1521104 | [yncD, yncE]                                                             | 1521171 | 1521185 | GTTAAGTAATTGAGA  | 4.10E-05 | - |
| 1545328 | [fdnG, fdnH, fdnI, yddG]                                                 | 1545241 | 1545255 | TAGCATTTTTTTAAC  | 9.86E-07 | + |
| 1561177 | [ddpA, ddpB, ddpC, ddpD, ddpF, ddpX]                                     | 1561204 | 1561218 | TAACTTTTGATCAAC  | 2.00E-05 | + |
| 1634690 | [nohA, tfaQ, ydfN, ydfO, ynfO]                                           | 1634722 | 1634736 | TAACGTAAAAACAAC  | 2.00E-05 | + |
| 1656023 | [dmsD, ynfE, ynfF, ynfG, ynfH]                                           | 1655892 | 1655906 | TAACACATTATCGAC  | 5.71E-05 | + |
| 1656023 | [dmsD, ynfE, ynfF, ynfG, ynfH]                                           | 1656056 | 1656070 | AAACTTTTATATAAC  | 4.59E-06 | + |
| 1665276 | [ynfK]                                                                   | 1665358 | 1665372 | TTAAAAAATGTTAAC  | 4.36E-05 | + |
| 1676106 | [pntA, pntB, ydgH]                                                       | 1676104 | 1676118 | TCGCAAAATATTAAC  | 4.10E-05 | + |
| 1676106 | [pntA, pntB, ydgH]                                                       | 1676227 | 1676241 | TAACATTAATTAAC   | 6.01E-08 | + |
| 1679945 | [rstA, rstB, ydgC]                                                       | 1679735 | 1679749 | CAGCATATAATCAAC  | 6.36E-05 | + |
| 1679945 | [rstA, rstB, ydgC]                                                       | 1680065 | 1680079 | TAACACTTCCATAAC  | 1.18E-05 | + |

|         |                                                                                |         |         |                  |          |   |
|---------|--------------------------------------------------------------------------------|---------|---------|------------------|----------|---|
| 1684835 | [fumC]                                                                         | 1684675 | 1684689 | TCACTTATTATTTAC  | 7.22E-06 | + |
| 1684835 | [fumC]                                                                         | 1684686 | 1684700 | TTACCATTTTGATAAC | 3.90E-06 | + |
| 1686560 | [fumA, manA]                                                                   | 1686483 | 1686497 | ACACACTTTTTTAAAC | 5.77E-06 | + |
| 1717784 | [anmK, slyB]                                                                   | 1717761 | 1717775 | GTTTATAATTGGTTG  | 1.54E-05 | - |
| 1717784 | [anmK, slyB]                                                                   | 1717895 | 1717909 | TTTCAATGATTAAAC  | 8.66E-05 | + |
| 1753532 | [pykF, ydhZ]                                                                   | 1753392 | 1753406 | GTTAAATCTTTGATA  | 1.54E-05 | - |
| 1830074 | [astA, astB, astC, astD, astE, xthA]                                           | 1830020 | 1830034 | GTAAATAATTCGTTA  | 8.97E-07 | - |
| 1830074 | [astA, astB, astC, astD, astE, xthA]                                           | 1830031 | 1830045 | GTTATTTATATGTTA  | 6.01E-08 | - |
| 1830074 | [astA, astB, astC, astD, astE, xthA]                                           | 1830042 | 1830056 | GTTAATAATAAGTAA  | 6.08E-07 | - |
| 1860226 | [gapA, msrB, yeaC, yeaD]                                                       | 1860023 | 1860037 | GTTGCTGAATCGTTT  | 5.71E-05 | - |
| 1860226 | [gapA, msrB, yeaC, yeaD]                                                       | 1860030 | 1860044 | AATCGTTTTTTCAAC  | 6.36E-05 | + |
| 1860226 | [gapA, msrB, yeaC, yeaD]                                                       | 1860500 | 1860514 | TAACAAAACATTAAC  | 8.97E-07 | + |
| 1860548 | [gapA, msrB, yeaC, yeaD]                                                       | 1860758 | 1860772 | CAACCTTTTATTAC   | 1.44E-05 | + |
| 1887810 | [fadD]                                                                         | 1887829 | 1887843 | GTTAACATAATATTA  | 2.16E-06 | - |
| 1887810 | [fadD]                                                                         | 1887831 | 1887845 | TAACATAATATTAAC  | 9.20E-08 | + |
| 1935504 | [pykA]                                                                         | 1935657 | 1935671 | GTCAACGGAGTATTA  | 8.88E-05 | - |
| 2238644 | [mglA, mglB, mglC]                                                             | 2238433 | 2238447 | GTTAATGAAGTGTTA  | 2.63E-07 | - |
| 2238644 | [mglA, mglB, mglC]                                                             | 2238562 | 2238576 | GTTACATACGGGTTA  | 6.36E-05 | - |
| 2238644 | [mglA, mglB, mglC]                                                             | 2238612 | 2238626 | GTTAAGATACTGTGA  | 8.23E-05 | - |
| 2241641 | [folE, yeiB, yeiG]                                                             | 2241830 | 2241844 | GTTAAAACATCGTTA  | 1.19E-06 | - |
| 2261573 | [fruA, fruB, fruK, setB]                                                       | 2259452 | 2259466 | GTTAAAAGGTTGTAA  | 6.65E-06 | - |
| 2261573 | [fruA, fruB, fruK, setB]                                                       | 2260565 | 2260579 | GTAATATCACTGTTA  | 5.71E-05 | - |
| 2264130 | [yeiQ]                                                                         | 2264236 | 2264250 | GTTAATTAATCGTTA  | 6.73E-08 | - |
| 2264130 | [yeiQ]                                                                         | 2264247 | 2264261 | GTTACTAAGACGTGA  | 3.66E-05 | - |
| 2276234 | [yejG]                                                                         | 2276286 | 2276300 | TCACAATTTGTTTAC  | 1.24E-06 | + |
| 2276234 | [yejG]                                                                         | 2276309 | 2276323 | TAACACATCATCAAC  | 6.22E-06 | + |
| 2276234 | [yejG]                                                                         | 2276498 | 2276512 | TTACATAAAAATAAAC | 5.77E-06 | + |
| 2284414 | [proL]                                                                         | 2284397 | 2284411 | GTTTATTTTCTGTTA  | 3.07E-05 | - |
| 2304795 | [mqo]                                                                          | 2304837 | 2304851 | TAACACTTAAGTAAC  | 4.86E-07 | + |
| 2311161 | [micF, ompC, rcsB, rcsD]                                                       | 2311266 | 2311280 | TCACAAATAATTAAC  | 3.58E-07 | + |
| 2311161 | [micF, ompC, rcsB, rcsD]                                                       | 2311491 | 2311505 | TAACAGGTCATAAAC  | 9.10E-05 | + |
| 2385014 | [yfbM]                                                                         | 2384824 | 2384838 | GTTATAACTTTGTTA  | 1.56E-06 | - |
| 2403302 | [nuoA, nuoB, nuoC, nuoE, nuoF, nuoG, nuoH, nuol, nuoJ, nuoK, nuoL, nuoM, nuoN] | 2403244 | 2403258 | TAACCTTTTGTCAAC  | 3.07E-06 | + |
| 2403302 | [nuoA, nuoB, nuoC, nuoE, nuoF, nuoG, nuoH, nuol, nuoJ, nuoK, nuoL, nuoM, nuoN] | 2403285 | 2403299 | TTACATAATATCAAC  | 4.95E-06 | + |
| 2403408 | [nuoA, nuoB, nuoC, nuoE, nuoF, nuoG, nuoH, nuol, nuoJ, nuoK, nuoL, nuoM, nuoN] | 2403507 | 2403521 | TTACGTATTTTTTAA  | 6.03E-05 | + |
| 2426013 | [argT, hisJ, hisM, hisP, hisQ]                                                 | 2425933 | 2425947 | GTTAATAAGACGTTG  | 1.18E-05 | - |
| 2458642 | [fadI, fadJ, yfcZ]                                                             | 2458543 | 2458557 | TAACCATTTTTTTTAC | 1.09E-06 | + |
| 2496513 | [yfdZ, ypdA, ypdB, ypdC]                                                       | 2496486 | 2496500 | TAACAAGAAAATTAC  | 3.26E-05 | + |
| 2496513 | [yfdZ, ypdA, ypdB, ypdC]                                                       | 2496502 | 2496516 | ACTCATTTTATTAAC  | 1.44E-05 | + |
| 2496513 | [yfdZ, ypdA, ypdB, ypdC]                                                       | 2496524 | 2496538 | TTTCAATAAATTTTAC | 3.87E-05 | + |
| 2511206 | [nupC]                                                                         | 2511149 | 2511163 | GTATCCGTTATGTTA  | 9.56E-05 | - |
| 2511206 | [nupC]                                                                         | 2511175 | 2511189 | GTTATCGAAGTGTTA  | 2.21E-06 | - |
| 2531506 | [crr, ptsH, ptsI]                                                              | 2531412 | 2531426 | GTTAAAAATGCGTAA  | 3.07E-06 | - |
| 2562498 | [yffS]                                                                         | 2562259 | 2562273 | TAACATCCTGGTAAA  | 3.97E-05 | + |
| 2562498 | [yffS]                                                                         | 2562405 | 2562419 | CAACAATAAACAAC   | 7.43E-05 | + |
| 2642874 | [ndk]                                                                          | 2642982 | 2642996 | TAACATTTTTTTTTAA | 8.97E-07 | + |

|         |                                                       |         |         |                  |          |   |
|---------|-------------------------------------------------------|---------|---------|------------------|----------|---|
| 2666938 | [hcaB, hcaC, hcaD, hcaE, hcaF, hcaR]                  | 2666971 | 2666985 | TCACATATTAGCAAC  | 8.34E-06 | + |
| 2714567 | [ung, yfiD]                                           | 2714526 | 2714540 | GTAAAACCATTGTTG  | 2.98E-05 | - |
| 2716655 | [trxC, yfiF]                                          | 2716693 | 2716707 | TAACATATTAGAAAC  | 9.86E-07 | + |
| 2723722 | [kgtP]                                                | 2723829 | 2723843 | GTAAAGGAAATATTA  | 6.86E-05 | - |
| 2735059 | [raiA]                                                | 2735075 | 2735089 | GTTGACAAAAAGTGA  | 1.35E-05 | - |
| 2786926 | [csiD, gabD, gabP, gabT, lhgO]                        | 2786862 | 2786876 | GTTACTAATTTGTTG  | 1.30E-06 | - |
| 2786926 | [csiD, gabD, gabP, gabT, lhgO]                        | 2786884 | 2786898 | TCACAATAAGAAAAC  | 3.45E-05 | + |
| 2940695 | [gcvA, gcvB]                                          | 2940619 | 2940633 | TAACAATTAGATCAC  | 3.90E-06 | + |
| 2940695 | [gcvA, gcvB]                                          | 2940639 | 2940653 | GTAACCTATTAGTTT  | 7.43E-05 | - |
| 2945364 | [metV, metW, metZ, mltA]                              | 2945356 | 2945370 | GTAAAAAAAAGGTTG  | 6.70E-06 | - |
| 3071826 | [epd, fbaA, pgk]                                      | 3071213 | 3071227 | TAACAATTTGATGAC  | 9.60E-06 | + |
| 3071826 | [epd, fbaA, pgk]                                      | 3071971 | 3071985 | TAACCCTACAATAAC  | 2.89E-05 | + |
| 3071826 | [epd, fbaA, pgk]                                      | 3072247 | 3072261 | TAACAACCAGTTTCC  | 4.78E-05 | + |
| 3071826 | [epd, fbaA, pgk]                                      | 3072292 | 3072306 | CAACGCATCTTCAAC  | 9.10E-05 | + |
| 3126199 | [glcA, glcB, glcC, glcD, glcE, glcF, glcG]            | 3126190 | 3126204 | GTTAACTCAATGTTA  | 4.39E-07 | - |
| 3126199 | [glcA, glcB, glcC, glcD, glcE, glcF, glcG]            | 3126192 | 3126206 | TAACTCAATGTTAAA  | 9.68E-05 | + |
| 3126199 | [glcA, glcB, glcC, glcD, glcE, glcF, glcG]            | 3126201 | 3126215 | GTTAAATTGATGTAA  | 1.44E-05 | - |
| 3229773 | [fadH]                                                | 3229657 | 3229671 | TAACAATTATTTTAC  | 1.69E-07 | + |
| 3237723 | [sstT]                                                | 3237786 | 3237800 | GTCAAAGAAATGTAA  | 1.76E-05 | - |
| 3237723 | [sstT]                                                | 3237885 | 3237899 | GCAAACACTTTGTTA  | 3.62E-06 | - |
| 3242778 | [exuT, uxaA, uxaC]                                    | 3242617 | 3242631 | GTTTTTAAAACGATA  | 2.13E-05 | - |
| 3265612 | [tdcR, yhaB, yhaC]                                    | 3265507 | 3265521 | TATCAATATTTTAAA  | 6.28E-05 | + |
| 3265612 | [tdcR, yhaB, yhaC]                                    | 3265549 | 3265563 | GAACAATTGATTAAC  | 6.86E-05 | + |
| 3273327 | [garD, garK, garL, garP, garR, rnpB]                  | 3273266 | 3273280 | CCTCATTTTAATAAC  | 2.89E-05 | + |
| 3316404 | [argG, infB, metY, nusA, pnp, rbfA, rimP, rpsO, truB] | 3316420 | 3316434 | CCACATTTTGTCAAC  | 1.35E-05 | + |
| 3382646 | [argR, mdh]                                           | 3382529 | 3382543 | CATCAATTTGATAAC  | 1.65E-05 | + |
| 3382646 | [argR, mdh]                                           | 3382540 | 3382554 | TAACAATTAATTTAC  | 1.05E-07 | + |
| 3492028 | [cysG, nirB, nirC, nirD]                              | 3491983 | 3491997 | GTTGCTGAATCGTTA  | 1.35E-05 | - |
| 3492028 | [cysG, nirB, nirC, nirD]                              | 3492119 | 3492133 | CAACTTTGATATTAC  | 8.23E-05 | + |
| 3524361 | [nudE, yrfF]                                          | 3524238 | 3524252 | TTGCATGTTATTTAC  | 9.10E-05 | + |
| 3524361 | [nudE, yrfF]                                          | 3524248 | 3524262 | TTTACATTTATGTAA  | 8.23E-05 | - |
| 3524361 | [nudE, yrfF]                                          | 3524249 | 3524263 | TTACATTTATGTAA   | 4.04E-07 | + |
| 3530592 | [pck, yhgE]                                           | 3530634 | 3530648 | AAACCAAGATTTAAC  | 3.45E-05 | + |
| 3538015 | [feoA, feoB, feoC]                                    | 3537892 | 3537906 | TATCATTTTCATTAAC | 1.42E-06 | + |
| 3538015 | [feoA, feoB, feoC]                                    | 3537912 | 3537926 | AAACCTTAATTAAC   | 4.59E-05 | + |
| 3559887 | [glpD, glpE, glpG, glpR]                              | 3559946 | 3559960 | GTTTTTTTCAATGTTA | 4.59E-06 | - |
| 3590371 | [ugpA, ugpB, ugpC, ugpE, ugpQ]                        | 3590424 | 3590438 | TTACAGAAAAATAAC  | 3.45E-05 | + |
| 3590371 | [ugpA, ugpB, ugpC, ugpE, ugpQ]                        | 3590434 | 3590448 | ATAACTTTTTTGTTA  | 6.86E-05 | - |
| 3590371 | [ugpA, ugpB, ugpC, ugpE, ugpQ]                        | 3590435 | 3590449 | TAACTTTTTTGTTC   | 3.61E-06 | + |
| 3628925 | [rbbA, yhhJ, yhil]                                    | 3628932 | 3628946 | TTACGTTTTATCAAC  | 2.02E-06 | + |
| 3663958 | [gadW, gadX]                                          | 3664061 | 3664075 | CTACATTTAATAAAC  | 3.90E-06 | + |
| 3663958 | [gadW, gadX]                                          | 3664183 | 3664197 | GTTTTTTACAACGTTA | 1.10E-05 | - |
| 3672576 | [yhjE]                                                | 3672608 | 3672622 | TAACTTTTTATTTAAC | 1.52E-07 | + |
| 3705901 | [dppA, dppB, dppC, dppD, dppF]                        | 3705906 | 3705920 | GTCAACAGAATGTGA  | 8.15E-05 | - |
| 3710288 | [yhjX]                                                | 3710227 | 3710241 | GTTATTTAATGGTTT  | 5.77E-06 | - |
| 3710288 | [yhjX]                                                | 3710247 | 3710261 | GTGACTGTTACGTTA  | 8.66E-05 | - |
| 3769994 | [mtlA, mtlD, mtlR, yibH, yibI]                        | 3769995 | 3770009 | TCACAAAGATTCAAC  | 3.45E-05 | + |
| 3775146 | [lldD, lldP, lldR]                                    | 3775289 | 3775303 | TAACATTTAGTTAAC  | 1.34E-08 | + |

|         |                                                                                       |         |         |                   |          |   |
|---------|---------------------------------------------------------------------------------------|---------|---------|-------------------|----------|---|
| 3783117 | [envC, gpmM, yibN, yibQ]                                                              | 3783274 | 3783288 | GTTGTCGCAATGTTG   | 9.10E-05 | - |
| 3839816 | [nepI]                                                                                | 3839829 | 3839843 | TAACGTTTTTGGCAAC  | 3.90E-06 | + |
| 3891772 | [yieE, yieF]                                                                          | 3891787 | 3891801 | GTAAAAAAGTTGTAA   | 6.65E-06 | - |
| 3964051 | [rhlB, rho, rhoL, trxA]                                                               | 3964173 | 3964187 | TAACCTTAGTGGTTGAC | 7.47E-05 | + |
| 4001289 | [yigF, yigG]                                                                          | 4001211 | 4001225 | TAACATAAATTTTAC   | 1.85E-06 | + |
| 4002722 | [pldA, yigI]                                                                          | 4002741 | 4002755 | GTTAATGAAATGTTG   | 3.58E-07 | - |
| 4002722 | [pldA, yigI]                                                                          | 4002855 | 4002869 | ATCAATAATTCGTTA   | 6.86E-05 | - |
| 4029098 | [fadA, fadB, hemG, pepQ, trkH, viqZ]                                                  | 4029047 | 4029061 | GTGTATTTTTGTGTTA  | 7.43E-05 | - |
| 4029098 | [fadA, fadB, hemG, pepQ, trkH, viqZ]                                                  | 4029058 | 4029072 | GTTAAAAATATGCAA   | 6.22E-06 | - |
| 4109884 | [tpiA, yjiQ]                                                                          | 4109979 | 4109993 | TCTCATTAAATTTTAC  | 6.36E-05 | + |
| 4131612 | [katG]                                                                                | 4131522 | 4131536 | GTTTATAAATAGTGT   | 3.45E-05 | - |
| 4131612 | [katG]                                                                                | 4131562 | 4131576 | TCACAAATTTTAAAC   | 3.07E-06 | + |
| 4131612 | [katG]                                                                                | 4131737 | 4131751 | CTACATCTCTTTAAC   | 3.66E-05 | + |
| 4158805 | [fabR, sthA, yijD]                                                                    | 4158690 | 4158704 | CAACATTTTGTATAAC  | 6.08E-07 | + |
| 4158805 | [fabR, sthA, yijD]                                                                    | 4158834 | 4158848 | ATACATAAAAAGCAAC  | 9.10E-05 | + |
| 4158805 | [fabR, sthA, yijD]                                                                    | 4158845 | 4158859 | CAACAGAATGGTAAC   | 9.68E-05 | + |
| 4194378 | [thiC, thiE, thiF, thiG, thiH, thiS]                                                  | 4194328 | 4194342 | GTAAATTACGCGTTA   | 3.45E-05 | - |
| 4213342 | [aceA, aceB, aceK]                                                                    | 4213145 | 4213159 | TAATTTACTGTTTAC   | 8.88E-05 | + |
| 4213342 | [aceA, aceB, aceK]                                                                    | 4213345 | 4213359 | GTTATCAACAAGTTA   | 1.18E-05 | - |
| 4285390 | [acs, actP, nrfA, nrfB, nrfC, nrfD, nrfE, nrfF, nrfG, yicH]                           | 4285296 | 4285310 | GTTAATAGATTGTTG   | 3.62E-06 | - |
| 4285390 | [acs, actP, nrfA, nrfB, nrfC, nrfD, nrfE, nrfF, nrfG, yicH]                           | 4285298 | 4285312 | TAATAGATTGTTGAT   | 8.15E-05 | + |
| 4285390 | [acs, actP, nrfA, nrfB, nrfC, nrfD, nrfE, nrfF, nrfG, yicH]                           | 4285417 | 4285431 | GTTAATAATATGTGG   | 1.42E-06 | - |
| 4285754 | [acs, actP, nrfA, nrfB, nrfC, nrfD, nrfE, nrfF, nrfG, yicH]                           | 4285640 | 4285654 | TTACAATTGATTAAA   | 2.70E-05 | + |
| 4323332 | [phnC, phnD, phnE, phnF, phnG, phnH, phnI, phnJ, phnK, phnL, phnM, phnN, phnO, phnP1] | 4323244 | 4323258 | GTTAATTA AAAAGTGA | 1.09E-06 | - |
| 4346914 | [dcuB, fumB]                                                                          | 4346757 | 4346771 | GTAAATAACATGTGT   | 4.59E-05 | - |
| 4346914 | [dcuB, fumB]                                                                          | 4347010 | 4347024 | GTTAATGTTTTGTTT   | 6.70E-06 | - |
| 4346914 | [dcuB, fumB]                                                                          | 4347028 | 4347042 | GTTATCTTATTGATA   | 1.87E-05 | - |
| 4364899 | [dcuA]                                                                                | 4364814 | 4364828 | TTTAACAAGTTGATA   | 2.70E-05 | - |
| 4364899 | [dcuA]                                                                                | 4364836 | 4364850 | GTTATTTTTTAAGTTA  | 4.59E-06 | - |
| 4427622 | [cycA]                                                                                | 4427735 | 4427749 | AAACATAAAAATTAAC  | 1.85E-06 | + |
| 4453635 | [fbp, mpl]                                                                            | 4453621 | 4453635 | TAACGTTTTTCATAAA  | 5.41E-05 | + |
| 4560721 | [yjiJ]                                                                                | 4560722 | 4560736 | GTTGTTAACAAGTTA   | 3.45E-05 | - |
| 4560721 | [yjiJ]                                                                                | 4560725 | 4560739 | GTTAACAAGTTAATA   | 2.00E-05 | - |
| 4560721 | [yjiJ]                                                                                | 4560727 | 4560741 | TAACAAGTTAATAAC   | 1.19E-06 | + |
| 4560721 | [yjiJ]                                                                                | 4560738 | 4560752 | TAACAAAAAGGTGAA   | 8.15E-05 | + |
| 4569664 | [yjiR, yjiS]                                                                          | 4569690 | 4569704 | GTTAAATAAAAAGTAA  | 6.63E-07 | - |
| 4609095 | [osmY]                                                                                | 4609146 | 4609160 | GTTTCAA AATTGTGA  | 6.70E-06 | - |
| 4609095 | [osmY]                                                                                | 4609169 | 4609183 | TAACAAAGTGATGAC   | 7.82E-05 | + |
| 4638669 | [arcA, yjiY]                                                                          | 4638636 | 4638650 | GTTAACAGTTTGTATG  | 8.15E-05 | - |
| 4638669 | [arcA, yjiY]                                                                          | 4638713 | 4638727 | ATACA ACTAATAAAC  | 7.43E-05 | + |
| 4638697 | [arcA, yjiY]                                                                          | 4638881 | 4638895 | GTTAAGAATTTGTAA   | 2.02E-06 | - |
