# Supplementary material for: Determining the Control Circuitry of Redox Metabolism at the Genome-Scale
Source: PubMed Central journal article supplement (PMC3974632; doi:10.1371/journal.pgen.1004264), 2014-04-03
Supplement: pgen.1004264.s015.pdf [file pgen.1004264.s015.pdf]

**Supplementary Table 7. Mean flux values above .1mmol/GDWH across all sampling points under anaerobic conditons.**

This table shows all reactions, whether or not they are directly regulated by ArcA or Fnr, their mean flux values, the percent of the total flux that this flux values corresponds too, and the list of genes associated with the reaction. For each reaction the regulation column is TRUE if at least one gene is directly regulated by ArcA or Fnr. The total percent of flux regulated can then be calculated by summing across all flux values which are regulated and dividing by the total.

| Reaction ID      | Regulation | Flux    | Percent total flux | Genes                                                                             |
|------------------|------------|---------|--------------------|-----------------------------------------------------------------------------------|
| Htex_reverse     | TRUE       | 27.7808 | 8.4607%            | [u'ompN', u'ompF', u'phoE', u'ompC']                                              |
| PGK_reverse      | FALSE      | 19.3293 | 5.8868%            | [u'pgk']                                                                          |
| GAPD             | TRUE       | 19.3290 | 5.8867%            | [u'gapA']                                                                         |
| ENO              | FALSE      | 18.9460 | 5.7701%            | [u'eno']                                                                          |
| PGM_reverse      | TRUE       | 18.9443 | 5.7695%            | [u'gpmM', u'ytjC', u'gpmA']                                                       |
| PFL              | TRUE       | 17.2725 | 5.2604%            | [u'pflD', u'pflC', u'pflA', u'pflB', u'tdcE', u'yfiD']                            |
| FORtex_reverse   | TRUE       | 17.2493 | 5.2533%            | [u'ompN', u'ompC', u'ompF', u'phoE']                                              |
| FORtpi           | TRUE       | 17.2453 | 5.2521%            | [u'focA', u'focB']                                                                |
| GLCptssp         | TRUE       | 10.0000 | 3.0455%            | [u'ptsI', u'manZ', u'manY', u'ptsG', u'malX', u'manX', u'crr', u'ptsH']           |
| GLCtexi          | FALSE      | 9.9920  | 3.0431%            | [u'lambB']                                                                        |
| PGI              | FALSE      | 9.9561  | 3.0321%            | [u'pgi']                                                                          |
| TPI              | FALSE      | 9.7057  | 2.9559%            | [u'tpiA']                                                                         |
| ACTex_reverse    | TRUE       | 8.2318  | 2.5070%            | [u'ompN', u'ompC', u'phoE', u'ompF']                                              |
| ACKr_reverse     | TRUE       | 8.0978  | 2.4662%            | [u'purT', u'ackA', u'tdcD']                                                       |
| PTAr             | TRUE       | 8.0941  | 2.4651%            | [u'pta', u'eutD']                                                                 |
| ETOHtex_reverse  | TRUE       | 8.0876  | 2.4631%            | [u'ompN', u'ompF', u'ompC', u'phoE']                                              |
| ALCD2x_reverse   | TRUE       | 8.0874  | 2.4630%            | [u'adhP', u'adhE', u'frmA']                                                       |
| ACALD_reverse    | TRUE       | 8.0868  | 2.4629%            | [u'adhE', u'mhpF']                                                                |
| F6PA             | FALSE      | 7.8669  | 2.3959%            | [u'fsaB', u'fsaA']                                                                |
| DHAPT            | TRUE       | 7.8646  | 2.3952%            | [u'dhaL', u'dhaK', u'dhaM', u'ptsI', u'ptsH']                                     |
| ATPS4rpp_reverse | FALSE      | 6.4443  | 1.9626%            | [u'atpG', u'atpB', u'atpI', u'atpH', u'atpF', u'atpE', u'atpC', u'atpD', u'atpA'] |
| THD2pp           | TRUE       | 2.9009  | 0.8835%            | [u'pntA', u'pntB']                                                                |
| NH4tpp           | FALSE      | 2.5488  | 0.7762%            | [u'amtB', None]                                                                   |
| NH4tex           | TRUE       | 2.5481  | 0.7760%            | [u'ompN', u'ompF', u'ompC', u'phoE']                                              |
| GLUDy_reverse    | FALSE      | 2.0117  | 0.6127%            | [u'gdhA']                                                                         |
| H2Otex           | TRUE       | 1.8513  | 0.5638%            | [u'ompN', None, u'ompA', u'ompF', u'phoE', u'ompC', u'ompG', u'ompL']             |
| H2Otpp           | FALSE      | 1.8476  | 0.5627%            | [u'acpZ', None]                                                                   |
| FBA              | FALSE      | 1.7950  | 0.5467%            | [u'fbaB', u'fbaA', u'ydjI']                                                       |
| PFK              | FALSE      | 1.7927  | 0.5460%            | [u'pfkA', u'pfkB']                                                                |
| PPKr_reverse     | FALSE      | 0.8995  | 0.2740%            | [u'ppk']                                                                          |
| PPC              | FALSE      | 0.7866  | 0.2395%            | [u'ppc']                                                                          |
| ASPTA_reverse    | FALSE      | 0.6965  | 0.2121%            | [u'aspC']                                                                         |
| ADK1             | FALSE      | 0.5882  | 0.1791%            | [u'adk']                                                                          |
| FADRx            | FALSE      | 0.4866  | 0.1482%            | [u'fre']                                                                          |
| GLNS             | TRUE       | 0.4208  | 0.1282%            | [u'glnA', u'puuA']                                                                |
| PGCD             | FALSE      | 0.3839  | 0.1169%            | [u'serA']                                                                         |
| PSP_L            | FALSE      | 0.3839  | 0.1169%            | [u'serB']                                                                         |
| PSERT            | FALSE      | 0.3839  | 0.1169%            | [u'serC']                                                                         |
| ICDHyr           | TRUE       | 0.2687  | 0.0818%            | [u'icd']                                                                          |
| ACONTb           | TRUE       | 0.2676  | 0.0815%            | [u'acnA', u'acnB']                                                                |
| ACONTa           | TRUE       | 0.2653  | 0.0808%            | [u'acnA', u'acnB']                                                                |
| CS               | TRUE       | 0.2635  | 0.0803%            | [u'gltA']                                                                         |
| ASAD_reverse     | FALSE      | 0.2559  | 0.0779%            | [u'asd']                                                                          |
| ASPK             | FALSE      | 0.2558  | 0.0779%            | [u'lysC', u'thrA', u'metL']                                                       |
| GHMT2r           | FALSE      | 0.2532  | 0.0771%            | [u'glyA']                                                                         |
| Pltex            | TRUE       | 0.2319  | 0.0706%            | [u'ompN', u'ompC', u'phoE', u'ompF']                                              |
| Plt2rpp          | TRUE       | 0.2294  | 0.0699%            | [u'pitA', u'pitB']                                                                |
| NDPK1            | TRUE       | 0.2138  | 0.0651%            | [u'ndk', u'adk']                                                                  |
| KARA1_reverse    | FALSE      | 0.2090  | 0.0636%            | [u'ilvC']                                                                         |
| MTHFD            | FALSE      | 0.2086  | 0.0635%            | [u'folD']                                                                         |
| MTHFC            | FALSE      | 0.2081  | 0.0634%            | [u'folD']                                                                         |
| ACLS             | FALSE      | 0.2058  | 0.0627%            | [u'ilvB', u'ilvH', u'ilvN', u'ilvI']                                              |
| DHAD1            | FALSE      | 0.2058  | 0.0627%            | [u'ilvD']                                                                         |
| PRPPS            | FALSE      | 0.1996  | 0.0608%            | [u'prs']                                                                          |
| RPE_reverse      | FALSE      | 0.1863  | 0.0567%            | [u'sgcE', u'rpe']                                                                 |
| RPI_reverse      | FALSE      | 0.1810  | 0.0551%            | [u'rpiA', u'rpiB']                                                                |
| MDH              | TRUE       | 0.1703  | 0.0519%            | [u'mdh']                                                                          |
| FUM              | TRUE       | 0.1697  | 0.0518%            | [u'fumA', u'fumB', u'fumC']                                                       |

|                 |       |        |                                     |
|-----------------|-------|--------|-------------------------------------|
| HSDy_reverse    | FALSE | 0.1679 | 0.0511% [u'metL', u'thrA']          |
| CBMKr           | FALSE | 0.1518 | 0.0462% [u'yqeA', u'yahI', u'ybcF'] |
| TKT2_reverse    | FALSE | 0.1442 | 0.0439% [u'tktA', u'tktB']          |
| ALATA_L_reverse | FALSE | 0.1398 | 0.0426% [u'yfdZ', u'yfbQ']          |
| TALA_reverse    | FALSE | 0.1393 | 0.0424% [u'talA', u'talB']          |
| IMPC_reverse    | FALSE | 0.1300 | 0.0396% [u'purH']                   |
| AICART          | FALSE | 0.1294 | 0.0394% [u'purH']                   |
| THRS            | TRUE  | 0.1281 | 0.0390% [u'thrC']                   |
| HSK             | TRUE  | 0.1281 | 0.0390% [u'thrB']                   |
| SUCOAS          | TRUE  | 0.1191 | 0.0363% [u'sucD', u'sucC']          |
| HCO3E           | FALSE | 0.1170 | 0.0356% [u'can', u'cynT']           |
| NDPK2           | TRUE  | 0.1105 | 0.0336% [u'ndk', u'adk']            |
| AIRC3_reverse   | FALSE | 0.1102 | 0.0336% [u'purE']                   |
| IPPMlb_reverse  | FALSE | 0.1098 | 0.0334% [u'leuC', u'leuD']          |
| PRAGSr          | FALSE | 0.1091 | 0.0332% [u'purD']                   |
| ADSL2r          | FALSE | 0.1080 | 0.0329% [u'purB']                   |
| IPPMla_reverse  | FALSE | 0.1080 | 0.0329% [u'leuC', u'leuD']          |
| LEUTAi          | FALSE | 0.1060 | 0.0323% [u'ilvE', u'tyrB']          |
| IPPS            | FALSE | 0.1060 | 0.0323% [u'leuA']                   |
| IPMD            | FALSE | 0.1060 | 0.0323% [u'leuB']                   |
| GLUPRT          | FALSE | 0.1054 | 0.0321% [u'purF']                   |
| PRFGS           | FALSE | 0.1054 | 0.0321% [u'purL']                   |
| PRAIS           | TRUE  | 0.1054 | 0.0321% [u'purM']                   |
| AIRC2           | FALSE | 0.1053 | 0.0321% [u'purK']                   |
| PRASCSi         | FALSE | 0.1053 | 0.0321% [u'purC']                   |
| VALTA_reverse   | FALSE | 0.1016 | 0.0309% [u'ilvE']                   |
