# Supplementary material for: Determining the Control Circuitry of Redox Metabolism at the Genome-Scale
Source: PubMed Central journal article supplement (PMC3974632; doi:10.1371/journal.pgen.1004264), 2014-04-03
Supplement: pgen.1004264.s017.pdf [file pgen.1004264.s017.pdf]

**Supplementary Table 9. Regulation of fluxes around key metabolites in fermentative conditions.** This table shows all of the biomass precursor, electron donor, and electron carrier molecules along with the associated flux amounts in which they are produced or consumed and the amount of this flux which is activated or repressed by ArcA and Fnr.

| Metabolite ID | Direction | Flux     | Percent activated | Percent repressed |
|---------------|-----------|----------|-------------------|-------------------|
| h_c           | producing | 29.88    | 0.7694            | 0.02965           |
| h_c           | consuming | 28.11    | 0.5807            | 0.01952           |
| h_e           | producing | 27.78    | 1                 | 0                 |
| nadh_c        | consuming | 20.2     | 0.9447            | 0.02695           |
| nadh_c        | producing | 20.18    | 0.9612            | 0.009489          |
| g3p_c         | producing | 19.53    | 0.0001866         | 0                 |
| g3p_c         | consuming | 19.53    | 0.9895            | 0                 |
| 13dpg_c       | producing | 19.33    | 0.9998            | 0                 |
| 13dpg_c       | consuming | 19.33    | 0.0001886         | 0                 |
| 3pg_c         | producing | 19.33    | 0.0001422         | 0                 |
| 3pg_c         | consuming | 19.33    | 0.9799            | 0                 |
| pep_c         | producing | 18.95    | 0                 | 0                 |
| pep_c         | consuming | 18.95    | 0.9479            | 0                 |
| pyr_c         | producing | 18.04    | 0.9955            | 0                 |
| pyr_c         | consuming | 17.84    | 0.9683            | 0                 |
| accoa_c       | producing | 17.34    | 0.9968            | 0.001034          |
| for_c         | producing | 17.28    | 0.9997            | 0                 |
| for_c         | consuming | 17.28    | 0.9983            | 0                 |
| accoa_c       | consuming | 17.26    | 0.9374            | 0.0463            |
| g6p_c         | producing | 10.01    | 0.999             | 0                 |
| g6p_c         | consuming | 10.01    | 0                 | 0                 |
| f6p_c         | producing | 9.974    | 0.0002192         | 0                 |
| f6p_c         | consuming | 9.974    | 0.0002192         | 0                 |
| ac_c          | producing | 8.246    | 0.982             | 0                 |
| etoh_c        | producing | 8.087    | 1                 | 0                 |
| nadph_c       | producing | 3.444    | 0.8423            | 0.07803           |
| nadph_c       | consuming | 3.324    | 0                 | 0.001561          |
| akg_c         | producing | 2.05     | 0                 | 0.1717            |
| akg_c         | consuming | 2.05     | 0                 | 0.004515          |
| oaa_c         | producing | 0.963    | 0                 | 0.1768            |
| oaa_c         | consuming | 0.9625   | 0                 | 0.2763            |
| fad_c         | consuming | 0.5031   | 0                 | 0.03281           |
| fadh2_c       | producing | 0.5031   | 0                 | 0.03281           |
| fad_c         | producing | 0.5029   | 0                 | 1                 |
| fadh2_c       | consuming | 0.5029   | 0                 | 1                 |
| fum_c         | producing | 0.2548   | 0                 | 0.01115           |
| e4p_c         | producing | 0.2375   | 0.00925           | 0                 |
| e4p_c         | consuming | 0.2375   | 0.009478          | 0                 |
| r5p_c         | producing | 0.2374   | 0                 | 0                 |
| r5p_c         | consuming | 0.2374   | 0                 | 0                 |
| fum_c         | consuming | 0.1877   | 0.05769           | 0.9065            |
| mal__L_c      | consuming | 0.1731   | 0                 | 1                 |
| mal__L_c      | producing | 0.1726   | 0                 | 1                 |
| succ_c        | producing | 0.1435   | 0.0755            | 0.01942           |
| succ_c        | consuming | 0.1396   | 0                 | 0.8531            |
| succoa_c      | producing | 0.1281   | 0                 | 0.9298            |
| succoa_c      | consuming | 0.1281   | 0                 | 0.02175           |
| glyc3p_c      | producing | 0.04302  | 0                 | 0                 |
| glyc3p_c      | consuming | 0.04293  | 0                 | 0                 |
| ac_c          | consuming | 0.0154   | 0.7876            | 0.2124            |
| gthrd_c       | producing | 0.009242 | 0                 | 0                 |
| gthrd_c       | consuming | 0.009242 | 0                 | 0                 |
| amet_c        | producing | 0.004715 | 0                 | 0                 |
| amet_c        | consuming | 0.004265 | 0                 | 0                 |
| lac__D_c      | producing | 0.003533 | 0                 | 0                 |
| lac__D_c      | consuming | 0.003533 | 0                 | 0                 |
| h_e           | consuming | 0.003098 | 1                 | 0                 |

|          |           |          |   |   |
|----------|-----------|----------|---|---|
| etoh_c   | consuming | 0.002348 | 1 | 0 |
| gthrd_e  | producing | 0.002033 | 1 | 0 |
| gthrd_e  | consuming | 0.002033 | 1 | 0 |
| gthrd_p  | producing | 0.002033 | 1 | 0 |
| gthrd_p  | consuming | 0.002033 | 1 | 0 |
| h2_p     | producing | 0.002021 | 1 | 0 |
| h2_p     | consuming | 0.002021 | 1 | 0 |
| lac__L_c | producing | 0.001994 | 0 | 0 |
| lac__L_c | consuming | 0.001994 | 0 | 0 |
| h2_c     | producing |          |   |   |
| h2_c     | consuming |          |   |   |
| mal__D_c | producing |          |   |   |
| mal__D_c | consuming |          |   |   |
