# Supplementary material for: Determining the Control Circuitry of Redox Metabolism at the Genome-Scale
Source: PubMed Central journal article supplement (PMC3974632; doi:10.1371/journal.pgen.1004264), 2014-04-03
Supplement: pgen.1004264.s019.pdf [file pgen.1004264.s019.pdf]

**Supplementary Table 11. This table shows the relative flux levels and differential transcriptional regulation values for reactions that differed by at least .25 mmol/GDWh mean sampled flux units between fermentative and nitrate respiratory conditions.** This table contains 91 gene associated reactions of which 89 are regulated by ArcA or Fnr. The first column is the COBRA reaction ID followed by the mean flux value in fermentative (fermen.) and nitrate respiratory (nitrate) conditions. The columns for Fermen. regulation and Nitrate regulation are the max absolute value levels of regulation (Fig 3) cause by ArcA or Fnr under that condition across all genes associated with the metabolic reaction. The flux difference and regulation difference is always the value of the nitrate condition minus the value of the fermentation condition. The plot in figure 5c is between the the last two columns of this table.

| Reaction ID    | Fermen. flux | Nitrate respiratory flux | Genes                                                                    | Fermen. regulation | Fermen. indirect regulation | Nitrate regulation | Nitrate indirect regulation | Flux difference (Fermen-nitrate) | Regulation difference (Fermen. - nitrate) |
|----------------|--------------|--------------------------|--------------------------------------------------------------------------|--------------------|-----------------------------|--------------------|-----------------------------|----------------------------------|-------------------------------------------|
| PGM_reverse    | 18.94        | 15.94                    | [u'gpmM', u'ytjC', u'gpmA']                                              | 1.108              | -3.79                       | 0                  | -0.7715                     | 3.004                            | 1.108                                     |
| ACLS           | 0.2058       | 0.6987                   | [u'ilvH', u'ilvN', u'ilvB', u'ilvI']                                     | 0                  | 0.7276                      | 0                  | 4.523                       | -0.4929                          | 0                                         |
| ADSL2r         | 0.108        | 0.361                    | [u'purB']                                                                | 0                  | 0                           | 0                  | 0.2172                      | -0.253                           | 0                                         |
| LEUTAi         | 0.106        | 0.36                     | [u'ilvE', u'tyrB']                                                       | 0                  | 0.8977                      | 0                  | 1.852                       | -0.254                           | 0                                         |
| PRPPS          | 0.1996       | 0.7148                   | [u'prs']                                                                 | 0                  | 1.132                       | 0                  | 0.6465                      | -0.5152                          | 0                                         |
| GLUPRT         | 0.1054       | 0.3578                   | [u'purF']                                                                | 0                  | 0.7997                      | 0                  | 0.5744                      | -0.2525                          | 0                                         |
| ACONTa         | 0.2653       | 8.166                    | [u'acnA', u'acnB']                                                       | -3.916             | -3.916                      | -2.651             | -2.651                      | -7.9                             | -1.265                                    |
| PTAr_reverse   | 0.008366     | 0.4414                   | [u'eutD', u'pta']                                                        | 2.708              | 2.708                       | 0.9757             | 0.9757                      | -0.433                           | 1.732                                     |
| ACONTb         | 0.2676       | 8.167                    | [u'acnA', u'acnB']                                                       | -3.916             | -3.916                      | -2.651             | -2.651                      | -7.9                             | -1.265                                    |
| NO3R2pp        | 2.787E-13    | 7.724                    | [u'narY', u'narG', u'narV', u'narZ', u'narH', u'narJ', u'narI', u'narW'] | 4.02               | 4.02                        | 10.61              | 10.61                       | -7.724                           | -6.592                                    |
| PFK_3          | 0.08597      | 0.4138                   | [u'pfkA']                                                                | 0                  | 0.8878                      | 0                  | 0                           | -0.3278                          | 0                                         |
| THRS           | 0.1281       | 0.4349                   | [u'thrC']                                                                | 0.5021             | 0.5021                      | 0.3755             | 0.3755                      | -0.3068                          | 0.1266                                    |
| ADK1           | 0.5882       | 2.078                    | [u'adk']                                                                 | 0                  | 0.7634                      | 0                  | 0                           | -1.49                            | 0                                         |
| CS             | 0.2635       | 8.162                    | [u'gltA']                                                                | -3.396             | -3.396                      | -2.718             | -2.718                      | -7.898                           | -0.6781                                   |
| THD2pp         | 2.901        | 1.608E-13                | [u'pntB', u'pntA']                                                       | 0.72               | 1.283                       | 0.822              | 0.822                       | 2.901                            | -0.102                                    |
| ACALD_reverse  | 8.087        | 0.003197                 | [u'mhpF', u'adhE']                                                       | 0.5875             | 0.5875                      | -3.749             | -3.749                      | 8.084                            | 4.336                                     |
| GLNS           | 0.4208       | 1.429                    | [u'puuA', u'glnA']                                                       | -3.3               | -3.3                        | 0                  | 0                           | -1.008                           | -3.3                                      |
| RPI_reverse    | 0.181        | 1.034                    | [u'rpiB', u'rpiA']                                                       | 0                  | -0.5984                     | 0                  | -0.8368                     | -0.853                           | 0                                         |
| GLUDy_reverse  | 2.012        | 6.874                    | [u'gdhA']                                                                | 0                  | -0.9882                     | 0                  | 0                           | -4.863                           | 0                                         |
| G6PDH2r        | 0.002477     | 1.272                    | [u'zwf']                                                                 | 0                  | -0.8385                     | 0                  | 0.1566                      | -1.27                            | 0                                         |
| HSK            | 0.1281       | 0.4349                   | [u'thrB']                                                                | 0.3449             | 0.3449                      | -0.262             | -0.262                      | -0.3068                          | 0.6068                                    |
| IPPMla_reverse | 0.108        | 0.3632                   | [u'leuD', u'leuC']                                                       | 0                  | 1.107                       | 0                  | 1.544                       | -0.2552                          | 0                                         |
| NH4tpp         | 2.549        | 8.652                    | [u'amtB', None]                                                          | 0                  | -1.648                      | 0                  | -5.893                      | -6.103                           | 0                                         |
| ASAD_reverse   | 0.2559       | 0.8663                   | [u'asd']                                                                 | 0                  | -0.4876                     | 0                  | -0.4261                     | -0.6104                          | 0                                         |
| PGCD           | 0.3839       | 1.35                     | [u'serA']                                                                | 0                  | 0.6601                      | 0                  | 0                           | -0.9659                          | 0                                         |
| ENO            | 18.95        | 15.94                    | [u'eno']                                                                 | 0                  | 0.1571                      | -0.7088            | -0.7088                     | 3.001                            | 0.7088                                    |
| IPPMlb_reverse | 0.1098       | 0.3664                   | [u'leuD', u'leuC']                                                       | 0                  | 1.107                       | 0                  | 1.544                       | -0.2566                          | 0                                         |
| PDH            | -7.209E-14   | 10.53                    | [u'aceE', u'aceF', u'lpd']                                               | -2.346             | -2.346                      | -1.264             | -1.264                      | -10.53                           | -1.083                                    |
| ASPTA_reverse  | 0.6965       | 2.354                    | [u'aspC']                                                                | 0                  | 0                           | 0                  | -0.3074                     | -1.657                           | 0                                         |

|               |            |           |                                                                                                                                               |        |         |         |         |         |         |  |
|---------------|------------|-----------|-----------------------------------------------------------------------------------------------------------------------------------------------|--------|---------|---------|---------|---------|---------|--|
|               |            |           | [u'nuoB',<br>u'nuoN',<br>u'nuoC',<br>u'nuoM',<br>u'nuoH',<br>u'nuoA',<br>u'nuoE',<br>u'nuoG',<br>u'nuoJ',<br>u'nuoK',<br>u'nuoF',<br>u'nuoL'] |        |         |         |         |         |         |  |
| NADH17pp      | 3.625E-12  | 17.54     |                                                                                                                                               | 3.419  | 3.419   | 2.833   | 2.833   | -17.54  | 0.5856  |  |
| FORtpi        | 17.25      | 1.336E-11 | [u'focA',<br>u'focB']                                                                                                                         | 0.6645 | 0.6645  | -0.6248 | -0.6248 | 17.25   | 1.289   |  |
| AKGDH         | -1.529E-13 | 7.267     | [u'sucB',<br>u'sucA', u'lpd']                                                                                                                 | -4.779 | -4.779  | -3.497  | -3.497  | -7.267  | -1.283  |  |
| TPI           | 9.706      | 8.574     | [u'tpiA']                                                                                                                                     | 0      | 0.3547  | 0       | -0.124  | 1.132   | 0       |  |
| GARFT         | 0.08194    | 0.3602    | [u'purN']                                                                                                                                     | 0.7729 | 1.386   | 0.2716  | 0.4197  | -0.2782 | 0.5014  |  |
| GND           | 3.054E-13  | 1.269     | [u'gnd']                                                                                                                                      | 0      | 0       | 0       | 0       | -1.269  | 0       |  |
| PRFGS         | 0.1054     | 0.3578    | [u'purL']                                                                                                                                     | 0      | 1.177   | 0       | 0.3985  | -0.2525 | 0       |  |
| HCO3E         | 0.117      | 0.389     | [u'can', u'cynT']                                                                                                                             | 0      | -1.428  | 0       | -1.624  | -0.272  | 0       |  |
| ICDHyr        | 0.2687     | 8.169     | [u'icd']                                                                                                                                      | -2.117 | -2.117  | -1.345  | -1.345  | -7.9    | -0.7716 |  |
| FBA           | 1.795      | 5.626     | [u'fbaA',<br>u'fbaB', u'ydl']                                                                                                                 | 0      | -1.548  | 0       | -0.5799 | -3.831  | 0       |  |
| PFK           | 1.793      | 5.622     | [u'pfbA',<br>u'pfbB']                                                                                                                         | 0      | 0.8878  | 0       | -0.3968 | -3.829  | 0       |  |
| PFL           | 17.27      | 7.66E-12  | [u'pflC', u'pflD',<br>u'pflB', u'tdcE',<br>u'pflA', u'yfid']                                                                                  | 3.578  | 3.578   | 4.726   | 4.726   | 17.27   | -1.149  |  |
| PGK_reverse   | 19.33      | 17.29     | [u'pgk']                                                                                                                                      | 0      | 0.3855  | 0       | -0.3484 | 2.038   | 0       |  |
| DHAD1         | 0.2058     | 0.6987    | [u'ilvD']                                                                                                                                     | 0      | 1.599   | 0       | 1.772   | -0.4929 | 0       |  |
| KARA1_reverse | 0.209      | 0.7071    | [u'ilvC']                                                                                                                                     | 0      | 0.2638  | 0       | 0       | -0.4981 | 0       |  |
| PGL           | 1.929E-11  | 1.269     | [u'pgl']                                                                                                                                      | 0      | -2.06   | 0       | -0.424  | -1.269  | 0       |  |
| PGI           | 9.956      | 8.578     | [u'pgi']                                                                                                                                      | 0      | -0.3461 | 0       | -0.767  | 1.378   | 0       |  |
| FADRx         | 0.4866     | 1.652     | [u'fre']                                                                                                                                      | 0      | 0       | 0       | -0.3758 | -1.166  | 0       |  |
| ALATA_L_rever | 0.1398     | 0.461     | [u'yfbQ',<br>u'yfdZ']                                                                                                                         | 0      | 0       | 0       | 1.968   | -0.3212 | 0       |  |
| PRAIS         | 0.1054     | 0.3578    | [u'purM']                                                                                                                                     | 0.3123 | 0.8902  | 0       | 0.3384  | -0.2525 | 0.3123  |  |
| NTRIR3pp      | 8.022E-14  | 6.487     | [u'nrfB', u'nrfA',<br>u'nrfC', u'nrfD']                                                                                                       | 5.259  | 5.259   | 6.174   | 6.174   | -6.487  | -0.9149 |  |
| PSP_L         | 0.3839     | 1.35      | [u'serB']                                                                                                                                     | 0      | 0.497   | 0       | 0.2683  | -0.9659 | 0       |  |
| AIRC3_reverse | 0.1102     | 0.361     | [u'purE']                                                                                                                                     | 0      | 0.9526  | 0       | -0.3078 | -0.2508 | 0       |  |
| PPKr_reverse  | 0.8995     | 3.048     | [u'ppk']                                                                                                                                      | 0      | -0.3632 | 0       | -0.6181 | -2.149  | 0       |  |
| AIRC2         | 0.1053     | 0.3576    | [u'purK']                                                                                                                                     | 0      | 0.7131  | 0       | 0.2822  | -0.2523 | 0       |  |
| PRASCSi       | 0.1053     | 0.3576    | [u'purC']                                                                                                                                     | 0      | 0.6648  | 0       | 0       | -0.2523 | 0       |  |
| HSDy_reverse  | 0.1679     | 0.5677    | [u'metL',<br>u'thrA']                                                                                                                         | 0      | 0       | -0.283  | -0.283  | -0.3998 | 0.283   |  |
| NADH16pp      | 3.585E-12  | 24.28     | [u'nuoB',<br>u'nuoN',<br>u'nuoK',<br>u'nuoM',<br>u'nuoH',<br>u'nuoA',<br>u'nuoE',<br>u'nuoG',<br>u'nuoJ',<br>u'nuoC',<br>u'nuoF',<br>u'nuoL'] | 3.419  | 3.419   | 2.833   | 2.833   | -24.28  | 0.5856  |  |
| IPPS          | 0.106      | 0.36      | [u'leuA']                                                                                                                                     | 0      | 0.6384  | 0       | 1.097   | -0.254  | 0       |  |
| PSERT         | 0.3839     | 1.35      | [u'serC']                                                                                                                                     | 0      | 0.497   | 0       | 0.3502  | -0.9659 | 0       |  |

|               |           |          |                                                                                                     |        |        |         |         |         |         |
|---------------|-----------|----------|-----------------------------------------------------------------------------------------------------|--------|--------|---------|---------|---------|---------|
| H2Otp         | 1.848     | 0.01737  | [u'aqpZ', None]                                                                                     | 0      | 0      | 0       | -0.7617 | 1.83    | 0       |
| AICART        | 0.1294    | 0.4411   | [u'purH']                                                                                           | 0      | 1.457  | 0       | 0.3499  | -0.3118 | 0       |
| TKT1          | 0.002543  | 0.2801   | [u'tktB', u'tktA']                                                                                  | 0      | -4.138 | 0       | -1.084  | -0.2775 | 0       |
| NTRIR4pp      | 5.517E-13 | 3.305    | [u'nrfD', u'nrfA',<br>u'nrfC', u'nrfB']                                                             | 5.259  | 5.259  | 6.174   | 6.174   | -3.305  | -0.9149 |
| PTAr          | 8.094     | 0.01554  | [u'eutD', u'pta']                                                                                   | 2.708  | 2.708  | 0.9757  | 0.9757  | 8.079   | 1.732   |
| MTHFC         | 0.2081    | 0.7929   | [u'folD']                                                                                           | 0      | 0      | 0       | -0.4093 | -0.5849 | 0       |
| MTHFD         | 0.2086    | 0.794    | [u'folD']                                                                                           | 0      | 0      | 0       | -0.4093 | -0.5854 | 0       |
| SUCOAS_rever  | 0.002786  | 6.847    | [u'sucD',<br>u'sucC']                                                                               | -5.539 | -5.539 | -2.969  | -2.969  | -6.844  | -2.571  |
| ATPS4rpp_reve | 6.444     | 0.004692 | [u'atpB',<br>u'atpH',<br>u'atpF', u'atpE',<br>u'atpC',<br>u'atpD',<br>u'atpG',<br>u'atpA', u'atpI'] | 0      | 1.449  | 0       | 0.4722  | 6.44    | 0       |
| Plt2rpp       | 0.2294    | 0.7743   | [u'pitA', u'pitB']                                                                                  | 2.765  | 2.765  | 1.241   | 1.355   | -0.5449 | 1.523   |
| MDH           | 0.1703    | 8.105    | [u'mdh']                                                                                            | -3.83  | -3.83  | -1.735  | -1.735  | -7.935  | -2.094  |
| ASPK          | 0.2558    | 0.8647   | [u'lysC',<br>u'metL', u'thrA']                                                                      | 0      | -2.525 | -0.283  | -1.032  | -0.6089 | 0.283   |
| FBA3          | 0.0888    | 0.4178   | [u'fbaA']                                                                                           | 0      | 0.2582 | 0       | 0       | -0.329  | 0       |
| ACKr_reverse  | 8.098     | 0.01907  | [u'tdcD',<br>u'purT',<br>u'ackA']                                                                   | 1.147  | 1.147  | 0.7709  | 0.8997  | 8.079   | 0.3761  |
| CBMKr         | 0.1518    | 0.5041   | [u'yahI',<br>u'yqeA',<br>u'ybcF']                                                                   | 0      | 0      | 0       | 1.047   | -0.3523 | 0       |
| ATPS4rpp      | 0.004155  | 39.28    | [u'atpB',<br>u'atpH',<br>u'atpF', u'atpE',<br>u'atpC',<br>u'atpD',<br>u'atpG',<br>u'atpA', u'atpI'] | 0      | 1.449  | 0       | 0.4722  | -39.28  | 0       |
| FUM           | 0.1702    | 8.106    | [u'fumA',<br>u'fumB',<br>u'fumC']                                                                   | -7.374 | -7.374 | -3.164  | -3.818  | -7.935  | -4.211  |
| ALCD2x_revers | 8.087     | 0.004112 | [u'frmA',<br>u'adhE',<br>u'adhP']                                                                   | 0.5875 | -7.416 | -1.103  | -1.103  | 8.083   | 1.691   |
| H2Otpp_revers | 0.006718  | 18.23    | [u'aqpZ', None]                                                                                     | 0      | 0      | 0       | -0.7617 | -18.22  | 0       |
| NDPK1         | 0.2138    | 0.6921   | [u'adk', u'ndk']                                                                                    | -3.066 | -3.066 | -2.573  | -2.573  | -0.4783 | -0.4922 |
| GHMT2r        | 0.2532    | 0.8977   | [u'glyA']                                                                                           | 0      | 0.7057 | 0       | 0.4058  | -0.6446 | 0       |
| IPMD          | 0.106     | 0.36     | [u'leuB']                                                                                           | 0      | 1.151  | 0       | 1.733   | -0.254  | 0       |
| GAPD          | 19.33     | 17.29    | [u'gapA']                                                                                           | 0.2259 | 0.2259 | -0.1395 | -0.1395 | 2.035   | 0.3655  |
| NO3R1pp       | 3.521E-14 | 12.28    | [u'narY',<br>u'narG',<br>u'narV',<br>u'narZ',<br>u'narH', u'narJ',<br>u'narI', u'narW']             | 4.02   | 4.02   | 10.61   | 10.61   | -12.28  | -6.592  |

|              |           |        |                                                        |        |        |        |        |         |        |
|--------------|-----------|--------|--------------------------------------------------------|--------|--------|--------|--------|---------|--------|
| ACKr         | 0.01213   | 0.4449 | [u'tdCD',<br>u'purT',<br>u'ackA']                      | 1.147  | 1.147  | 0.7709 | 0.8997 | -0.4328 | 0.3761 |
| PPC          | 0.7866    | 2.406  | [u'ppc']                                               | 0      | 0      | 0      | 0      | -1.619  | 0      |
| PRAGSr       | 0.1091    | 0.3652 | [u'purD']                                              | 0      | 0.7674 | 0      | 0.873  | -0.2561 | 0      |
| SUCDi        | 1.581E-12 | 7.376  | [u'sdhA',<br>u'sdhD',<br>u'sdhC',<br>u'sdhB']          | -10.01 | -10.01 | -6.876 | -6.876 | -7.376  | -3.136 |
| IMPC_reverse | 0.13      | 0.437  | [u'purH']                                              | 0      | 1.457  | 0      | 0.3499 | -0.307  | 0      |
| DHAPT        | 7.865     | 2.669  | [u'dhaK',<br>u'dhaM',<br>u'ptsH',<br>u'dhaL', u'ptsI'] | 2.049  | 2.049  | 0      | 0.8706 | 5.195   | 2.049  |
| F6PA         | 7.867     | 2.675  | [u'fSaA',<br>u'fSaB']                                  | 0      | 0      | 0.35   | 0.35   | 5.192   | -0.35  |
| NO3t7pp      | 5.017E-13 | 20     | [u'narK',<br>u'narU']                                  | 0      | 0      | 8.447  | 8.447  | -20     | -8.447 |
