# Supplementary material for: Determining the Control Circuitry of Redox Metabolism at the Genome-Scale
Source: PubMed Central journal article supplement (PMC3974632; doi:10.1371/journal.pgen.1004264), 2014-04-03
Supplement: pgen.1004264.s020.pdf [file pgen.1004264.s020.pdf]

**Supplementary Table 12. Regulation of altered reactions based on sampling of flux solutions between fermentative and nitrate respiratory conditions.** After calculating the set of reactions which differ in their flux values between fermentative and nitrate respiratory conditions we sought to understand how many of these reactions were regulated by ArcA and Fnr. Altered reactions describes the total number of reactions which differ between the conditions by the flux cutoff (e.g. 91 reactions differ between the two conditions by at least .25 mmol/GDW-h). Of these 91 reactions, 40 are directly regulated by ArcA or Fnr and another 49 are indirectly regulated.

| Flux cutoff (mmol/GDW-h) | Altered reactions | Directly regulated reactions | Indirectly regulated reactions | Total reactions regulated | Percent reactions regulated |
|--------------------------|-------------------|------------------------------|--------------------------------|---------------------------|-----------------------------|
| 0.25                     | 91                | 40                           | 49                             | 89                        | 0.978021978                 |
| 0.1                      | 180               | 75                           | 98                             | 173                       | 0.961111111                 |
| 0.05                     | 213               | 83                           | 121                            | 204                       | 0.957746479                 |
| 0.01                     | 303               | 105                          | 176                            | 281                       | 0.927392739                 |
| 0.005                    | 332               | 109                          | 197                            | 306                       | 0.921686747                 |
| 0.001                    | 801               | 213                          | 426                            | 639                       | 0.797752809                 |
