# Supplementary material for: Determining the Control Circuitry of Redox Metabolism at the Genome-Scale
Source: PubMed Central journal article supplement (PMC3974632; doi:10.1371/journal.pgen.1004264), 2014-04-03
Supplement: pgen.1004264.s021.pdf [file pgen.1004264.s021.pdf]

| Transcription factor gene name | Metabolite ID from iJO1366 | Metabolite name                |
|--------------------------------|----------------------------|--------------------------------|
| appY                           | o2_c                       |                                |
| narL                           | no3_c                      |                                |
| dcuR                           | fum_c                      |                                |
| gadX                           | glu-L_c                    |                                |
| gadW                           | glu-L_c                    |                                |
| gadE                           | glu-L_c                    |                                |
| birA                           | btn_c                      | biotin                         |
| caiF                           | crnDcoa_c                  | carnitine                      |
| betI                           | g3pc_c                     | choline                        |
| cysB                           | acser_c                    | O-Acetyl-L-serine              |
| dhaR                           | dha_c                      | dihydroxyacetone               |
| fabR                           | actACP_c,aacoa_c           | acetyl-phosphate,acetyl-CoA    |
| fadR                           | actACP_c                   | acetyl-phosphate               |
| fhIA                           | for_c                      | formate                        |
| glcC                           | glcn_c                     | gluconate                      |
| lldR                           | lac-D_c,lac-L_c            | D-lactate,L-lactate            |
| metJ                           | hcys-L_c                   | L-Homocysteine                 |
| metR                           | amet_c                     | S-Adenosylmethionine           |
| mhpR                           | 3hpppn_c                   | 3-(3-hydroxy-phenyl)propionate |
| modE                           | moco_c                     | molybdenum                     |
| nac                            | nh4_c                      | low_nitrogen                   |
| nikR                           | ni2_c                      | nickel                         |
| crp                            | camp_c                     |                                |
| oxyR                           | o2s_c                      | superoxide anion               |
| pdhR                           | pyr_c                      | pyruvate                       |
| putA                           | pro-L_c                    | proline                        |
| rbsR                           | rib-D_c                    | ribose                         |
| fur                            | fe2_c                      | Fe_2+                          |
| iclR                           | pep_c,pyr_c,glx_c          | phosphoenolpyruvate            |
| kdgR                           | 2ddglcn_c                  | 2-Dehydro-3-deoxy-D-           |
| marA                           | 4hbz_c                     | 4-hydroxybenzoate/2-           |
| marR                           | 23dhb_c                    | 2,3-Dihydroxybenzoat           |
| nhaR                           | na1_c                      | Sodium                         |
| zraR                           | zn2_c                      | Zinc                           |
| argP                           | arg-L_c,lys-L_c            | arginine,lysine                |
| argR                           | arg-L_c                    | arginine                       |
| asnC                           | asn-L_c                    | asparagine                     |
| cueR                           | cu_c                       | copper                         |
| cusR                           | cu2_c                      | copper2                        |
| cynR                           | cynt_c                     | cyanate                        |
| cytR                           | cytd_c                     | cytidine                       |
| dnaA                           | atp_c                      | ATP                            |

|      |                             |       |
|------|-----------------------------|-------|
| dsdC | ser-D_c D-serine            |       |
| galR | gal_c galactose             |       |
| galS | gal_c galactose             |       |
| gcvA | gly-L_c L-glycine           |       |
| hcaR | 3hpppn_c 3-phenylpropionate |       |
| iscR | fe2_c Fe_2+                 |       |
| lysR | lys-L_c L-lysine            |       |
| prpR | micit_c methylisocitrate    |       |
| malT | malt_c maltose              |       |
| rpoS | stress                      |       |
| trpR | trp__L_c                    |       |
| tyrR | tyr__L_c                    |       |
| rutR | thym_c                      | ura_c |
| alaS | ala__D_c                    |       |
| allR | glx_c                       |       |
| allS | alltn_c                     |       |
| alsR | all__D_c                    |       |
| araC | arab__L_c                   |       |
| asnC | asn__L_c                    |       |
| cdaR | glyc__R_c                   |       |
| deoR | r5p_c                       |       |
| dpiA | cit_c                       |       |
| xylR | xyl__D_c                    |       |
| xapR | xtsn_c                      |       |
| uxuR | fruur_c                     |       |
| ulaR | ascb6p_c                    |       |
| uhpA | g6p_e                       |       |
| treR | tre6p_c                     |       |
| soxR | o2s_c                       |       |
| rhaR | rmn_c                       |       |
| rhaS | rmn_c                       |       |
| puuR | ptrc_c                      |       |
| purR | hxan_c                      |       |
| paaX | phaccoa_c                   |       |
| nsrR | no_c                        |       |
| nemR | mthgxl_c                    |       |
| narP | no3_c                       |       |
| nanR | acnam_c                     |       |
| nagC | acgam6p_c                   |       |
| murR | acmum6p_c                   |       |
| mtlR | mnl_e                       |       |
| melR | melib_c                     |       |
| idnR | 5dglcn_c                    |       |

gntR  
glpR  
galR  
galS

glcn\_c  
glyc3p\_c  
gal\_c  
gal\_c

,pyruvate,glyoxylate  
-gluconate  
-Hydroxybenzoic\_acid  
:e
