# Supplementary material for: Determining the Control Circuitry of Redox Metabolism at the Genome-Scale
Source: PLOS journal article supplement (doi:10.1371/journal.pgen.1004264), 2014-04-03

## Fnr direct regulation discrepancies

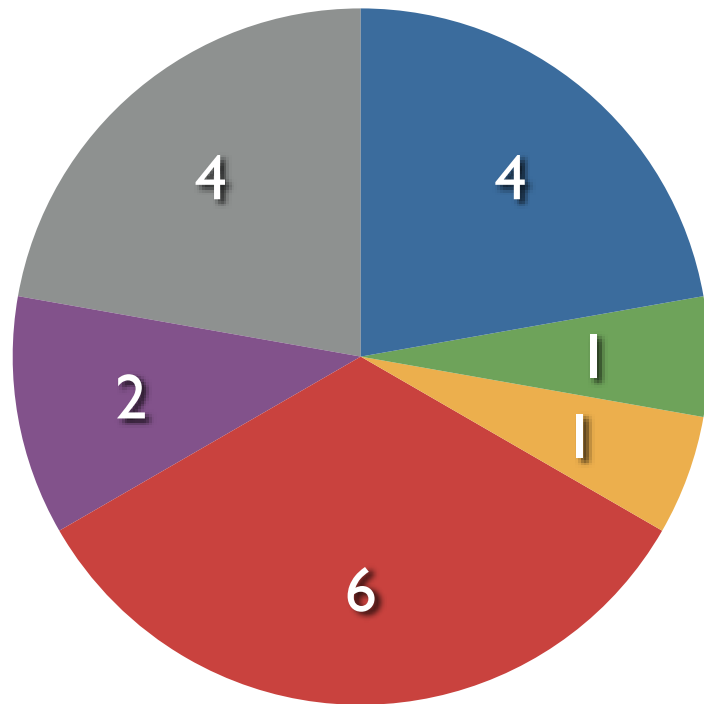

- 18/53 direct regulatory targets not found in our data

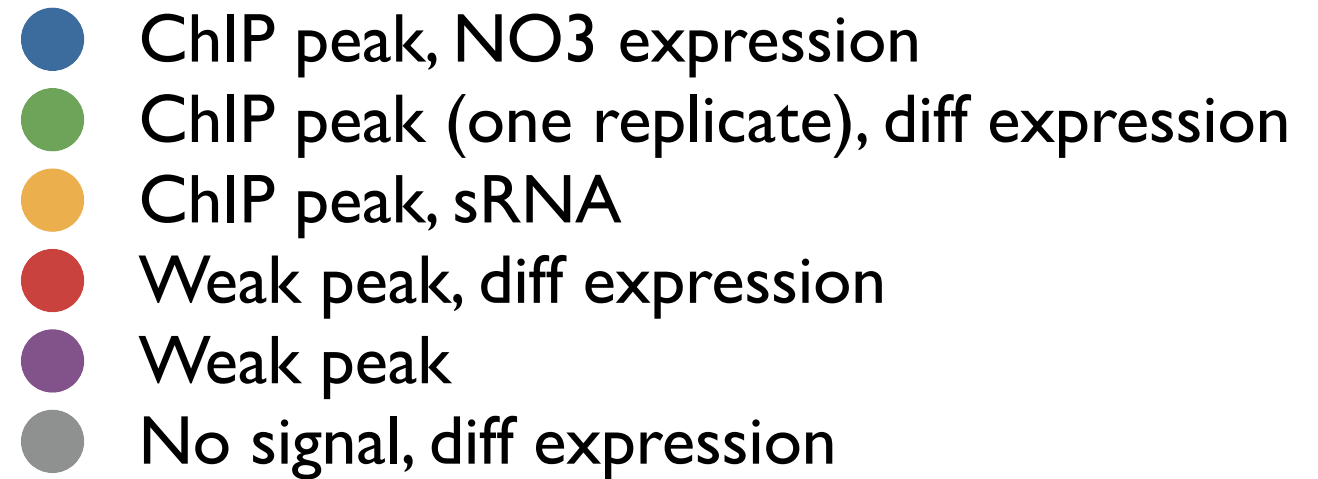

## ArcA direct regulation discrepancies

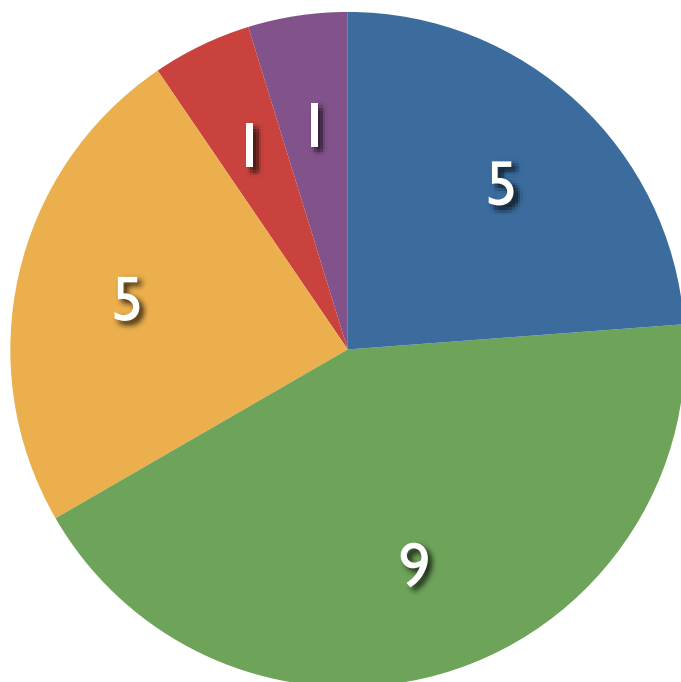

- 21/85 direct regulatory targets not found in our data

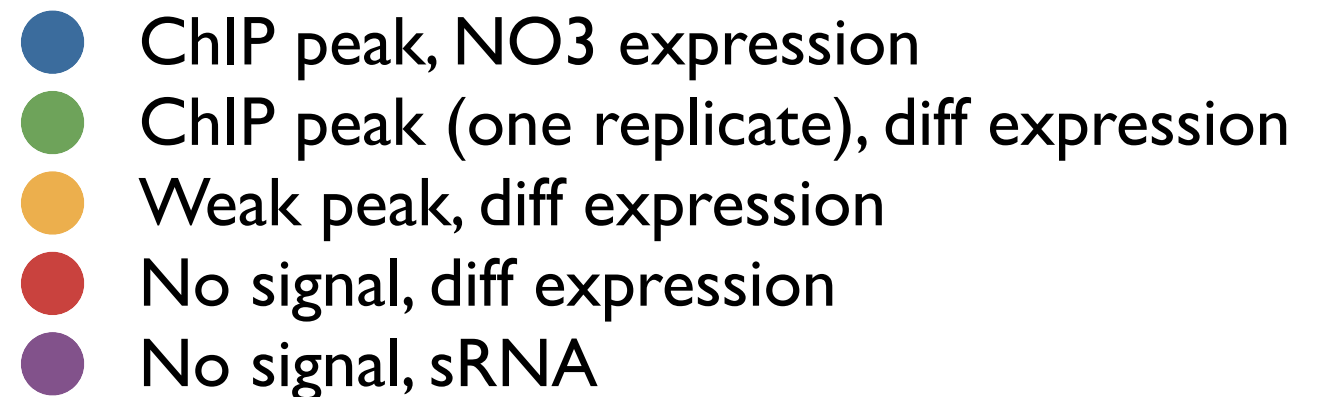

Supplement: S4 (10.1371/journal.pgen.1004264.s004) [file journal.pgen.1004264.s004]
